# Supplementary material for: Tipping the balance between twist and chair ligand conformers in multinuclear ethylzinc cyclophosphazenates
Source: Royal Society of Chemistry journal article supplement (doi:10.1039/d4dt03004d), 2024-12-27
Supplement: d4dt03004d1.pdf [file d4dt03004d1.pdf]

Supporting information

## Tipping the balance between *twist* and *chair* ligand conformers in multinuclear ethylzinc cyclophosphazenes.

Ramamoorthy Boomishankar, Philip I. Richards and Alexander Steiner \*

### Experimental

**General methods.** All manipulations were performed under a dry N<sub>2</sub> nitrogen atmosphere. Solvents were dried over potassium (thf, hexane) and sodium (toluene). Phosphazene ligand precursors were prepared as reported previously.<sup>S1</sup> Diethylzinc (1.0 M in hexane) was purchased from Aldrich and used as received. NMR spectra were recorded on a Bruker AMX 400 spectrometer (<sup>1</sup>H NMR: 400.13 MHz, <sup>13</sup>C{<sup>1</sup>H} NMR: 100.62 MHz, <sup>31</sup>P{<sup>1</sup>H} NMR: 161.97 MHz) at room temperature in toluene-d<sub>8</sub> using SiMe<sub>4</sub> (<sup>1</sup>H, <sup>13</sup>C) and 85% H<sub>3</sub>PO<sub>4</sub> (<sup>31</sup>P) as external standards.

**Synthesis of 5.** To a suspension of **1** (1.00 g, 3.17 mmol) in thf (20 mL) was added Et<sub>2</sub>Zn solution (19.35 mL, 19.35 mmol). The reaction mixture was refluxed for 15 minutes resulting in a clear solution that was filtered after left to cool under stirring for 1 h. Storing the solution at -20 °C yielded colourless crystals. Yield 2.39 g (86 %). m.p. 190 °C (dec.). <sup>1</sup>H NMR: δ 0.39 [m, 24H, ZnCH<sub>2</sub>CH<sub>3</sub>], 1.29 [m, 36H, ZnCH<sub>2</sub>CH<sub>3</sub>], 2.52 [br, 36H, NCH<sub>3</sub>]. <sup>13</sup>C{<sup>1</sup>H} NMR: δ 11.8 [m, ZnCH<sub>2</sub>CH<sub>3</sub>], 32.2 [m, ZnCH<sub>2</sub>CH<sub>3</sub>], 32.1 [br, NCH<sub>3</sub>]. <sup>31</sup>P{<sup>1</sup>H} NMR: δ 44.9 [d, 1P, <sup>2</sup>J 8.5 = Hz], 37.7 [dd, 1P, <sup>2</sup>J = 8.5 and 28.8 Hz] and 26.8 [d, 1P, <sup>2</sup>J = 28.8 Hz].

**Synthesis of 6.** To a suspension of **2** (1.00 g, 2.50 mmol) in hexane (20 mL) was added Et<sub>2</sub>Zn solution (15.27 mL, 15.27 mmol). The reaction mixture was refluxed for 15 minutes resulting in a clear solution that was filtered after left to cool under stirring for 1 h. Storing the solution at room temperature yielded colourless crystals. Yield 1.71 g (76 %). m.p. 118 °C (dec.). <sup>1</sup>H NMR: δ 0.67 [m, 20H, ZnCH<sub>2</sub>CH<sub>3</sub>], 1.28 [m, 30H, ZnCH<sub>2</sub>CH<sub>3</sub>], 1.28 - 1.49 [m, 18H, NCH<sub>2</sub>CH<sub>3</sub>], 3.13 [m, 12H, NCH<sub>2</sub>CH<sub>3</sub>]. <sup>13</sup>C{<sup>1</sup>H} NMR: δ 12.7 [m, ZnCH<sub>2</sub>CH<sub>3</sub>], 18.0 [br, NCH<sub>2</sub>CH<sub>3</sub>], 30.3 [m, ZnCH<sub>2</sub>CH<sub>3</sub>], 40.5 [br, NCH<sub>2</sub>CH<sub>3</sub>]. <sup>31</sup>P{<sup>1</sup>H} NMR: δ 44.7 [1P], 39.5 [2P].

**Synthesis of 7.** To a suspension of **3** (1.00 g, 2.07 mmol) in hexane (20 mL) was added Et<sub>2</sub>Zn solution (12.61 mL, 12.61 mmol). The reaction mixture was refluxed for 2 h resulting in a clear solution that was filtered after left to cool under stirring for 1 h. Storing the solution at -20 °C yielded colourless crystals. Yield 0.50 g (82 %). m.p. 142 °C (dec.). <sup>1</sup>H NMR: δ 0.65 [m, 20H, ZnCH<sub>2</sub>CH<sub>3</sub>], 0.75 [m, 36H, NCH<sub>2</sub>CH<sub>2</sub>CH<sub>3</sub>], 1.10 [m, 30H, ZnCH<sub>2</sub>CH<sub>3</sub>], 1.34 [m, 24H, NCH<sub>2</sub>CH<sub>2</sub>CH<sub>3</sub>], 2.90 [m, 24H, NCH<sub>2</sub>CH<sub>2</sub>CH<sub>3</sub>]. <sup>13</sup>C{<sup>1</sup>H} NMR: δ 11.9 [m, ZnCH<sub>2</sub>CH<sub>3</sub>], 12.0 [br, NCH<sub>2</sub>CH<sub>2</sub>CH<sub>3</sub>], 30.3 [m, ZnCH<sub>2</sub>CH<sub>3</sub>], 30.5 [br, NCH<sub>2</sub>CH<sub>2</sub>CH<sub>3</sub>], 42.0 [br, NCH<sub>2</sub>CH<sub>2</sub>CH<sub>3</sub>]. <sup>31</sup>P{<sup>1</sup>H} NMR: δ 45.2 [1P], 38.9 [2P].

**Synthesis of 9.** To a suspension of **4** (0.30 g, 0.53 mmol) in hexane (15 mL) was added Et<sub>2</sub>Zn solution (3.7 mL, 3.7 mmol). The reaction mixture was refluxed for 15 minutes resulting in a clear solution that was filtered after left to cool under stirring for 1 h. The filtrate was concentrated (3 ml) and stored at -20 °C. Colourless crystals formed after 2 days. Yield: 0.25 g (42%); m.p. 186 °C (dec.); <sup>1</sup>H NMR: δ 0.32 [q, 12 H, CH<sub>3</sub>CH<sub>2</sub>Zn, <sup>3</sup>J = 8.2 Hz], 0.88 [d, 36H, N(CH<sub>2</sub>CH(CH<sub>3</sub>)<sub>2</sub>), <sup>3</sup>J = 6.4 Hz], 1.14 [t, 18 H, CH<sub>3</sub>CH<sub>2</sub>Zn, <sup>3</sup>J = 8.2 Hz], 1.52-1.58 [m, 6H, (CH<sub>2</sub>CH(CH<sub>3</sub>)<sub>2</sub>)], 2.68 - 2.72 [m, 12H, N(CH<sub>2</sub>CH(CH<sub>3</sub>)<sub>2</sub>)].

$^{13}\text{C}\{^1\text{H}\}$  NMR:  $\delta$  1.2 [s,  $\text{CH}_3\text{CH}_2\text{Zn}$ ], 12.5 [s,  $\text{CH}_3$ ], 21.3 [s,  $\text{CH}_3\text{CH}_2\text{Zn}$ ], 32.5 [s,  $\text{CH}_2$ ], 52.6 [s,  $\text{CH}$ ].  
 $^{31}\text{P}\{^1\text{H}\}$  NMR:  $\delta$  42.6.

**Synthesis of 10.** To a suspension of **4** (0.30 g, 0.53 mmol) in hexane (15 mL) was added  $\text{Et}_2\text{Zn}$  solution (3.7 mL, 3.7 mmol). The reaction mixture was refluxed for 2 days and then filtered. The filtrate was concentrated (3 ml) and stored at  $-20\text{ }^\circ\text{C}$ . Colourless crystals formed after 2 days. Yield: 0.41 g (77%); m.p.  $208\text{ }^\circ\text{C}$  (dec.);  $^1\text{H}$  NMR:  $\delta$  0.6-0.8 [m, 16 H,  $\text{CH}_3\text{CH}_2\text{Zn}$ ], 0.9-1.2 [m, 36H,  $\text{N}(\text{CH}_2\text{CH}(\text{CH}_3)_2)$ ], 1.55 [m, 12 H,  $\text{CH}_3\text{CH}_2\text{Zn}$ ], 1.76 - 1.82 [m, 4H,  $\text{N}(\text{CH}_2\text{CH}(\text{CH}_3)_2)$ ], 1.91 - 1.97 [m, 2H,  $\text{N}(\text{CH}_2\text{CH}(\text{CH}_3)_2)$ ], 2.93 - 3.07 [m, 8H,  $\text{N}(\text{CH}_2\text{CH}(\text{CH}_3)_2)$ ], 3.17 - 3.25 [m, 4H,  $\text{N}(\text{CH}_2\text{CH}(\text{CH}_3)_2)$ ].  $^{13}\text{C}\{^1\text{H}\}$  NMR:  $\delta$  -0.7 - 1.3 [m,  $\text{CH}_3\text{CH}_2\text{Zn}$ ], 11.4 - 12.9 [m,  $\text{CH}_3$ ], 20.5 - 21.7 [m,  $\text{CH}_3\text{CH}_2\text{Zn}$ ], 30.7 - 31.7 [m,  $\text{CH}_2$ ], 50.8 - 53.5 [m,  $\text{CH}$ ].  $^{31}\text{P}\{^1\text{H}\}$  NMR:  $\delta$  41.4 [d, 2P,  $^2J = 9.9\text{ Hz}$ ], 43.3 [t, 1P,  $^2J = 9.9\text{ Hz}$ ].

S1 J. F. Bickley, R. Bonar-Law, G. T. Lawson, P. I. Richards, F. Rivals, A. Steiner and S. Zacchini, *Dalton Trans.*, 2003, 1235.

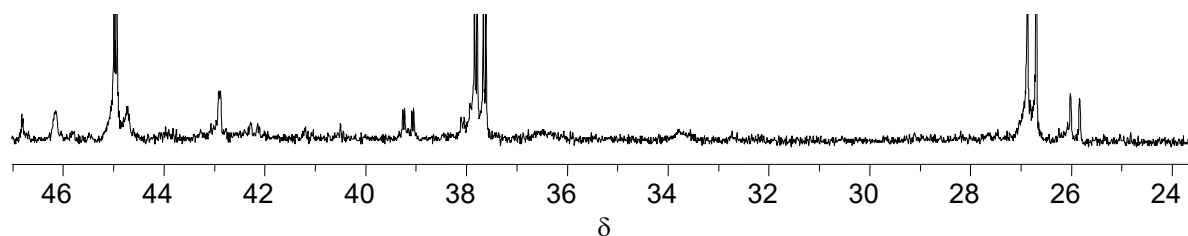

**Fig. S1**  $^{31}\text{P}\{^1\text{H}\}$  NMR of crystals of **5** redissolved in hexane.

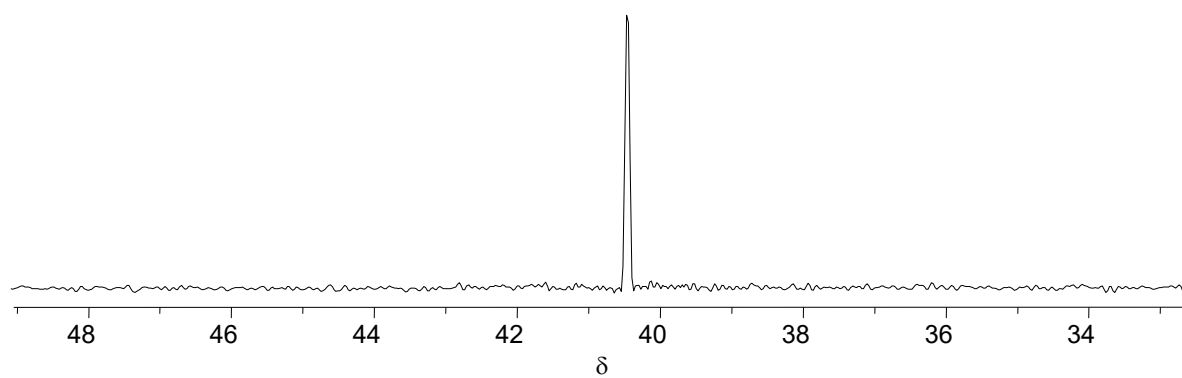

(a)

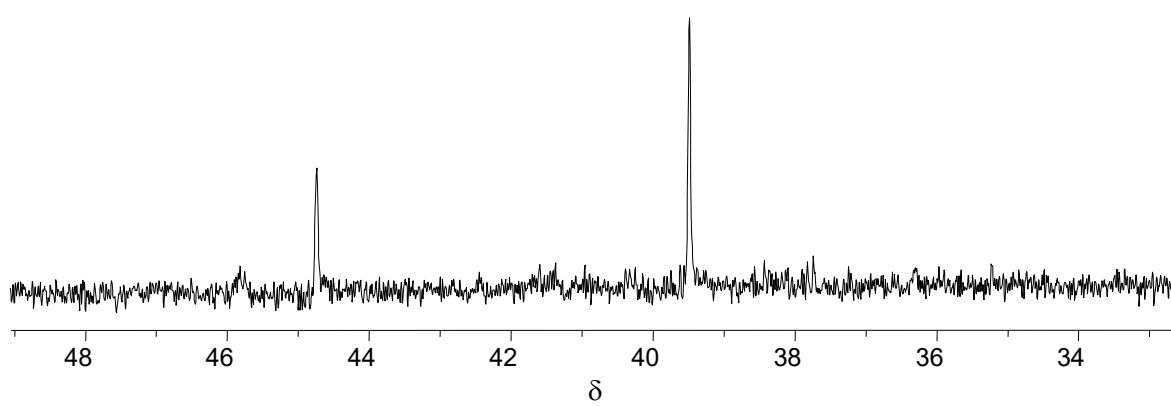

(b)

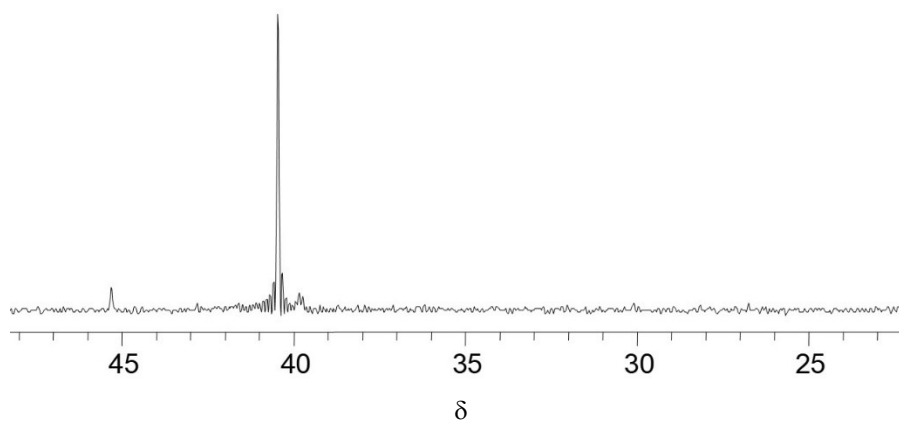

(c)

**Fig. S2**  $^{31}\text{P}\{^1\text{H}\}$  NMR spectra of (a) reaction solution of **6a** prior to crystallisation, (b) crystals of **6** redissolved in hexane, (c) crystals of **6** redissolved in hexane and treated with one equivalent  $\text{Et}_2\text{Zn}$ .

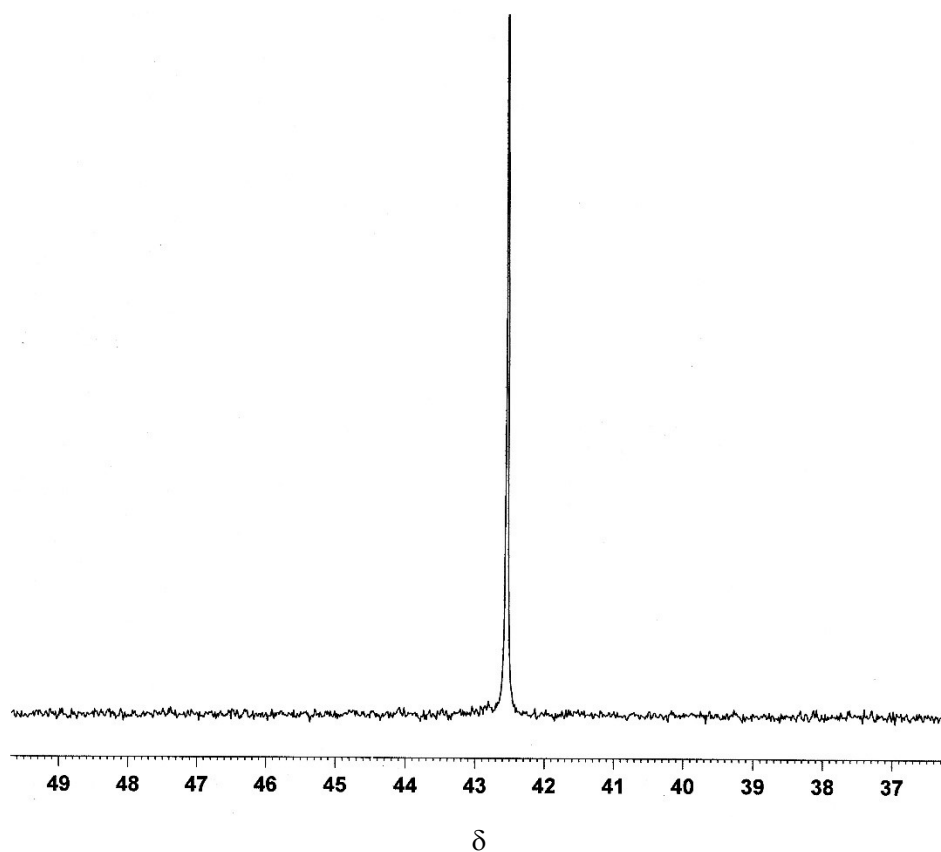

**Fig. S3**  $^{31}\text{P}\{^1\text{H}\}$  NMR of redissolved crystals of **9**.

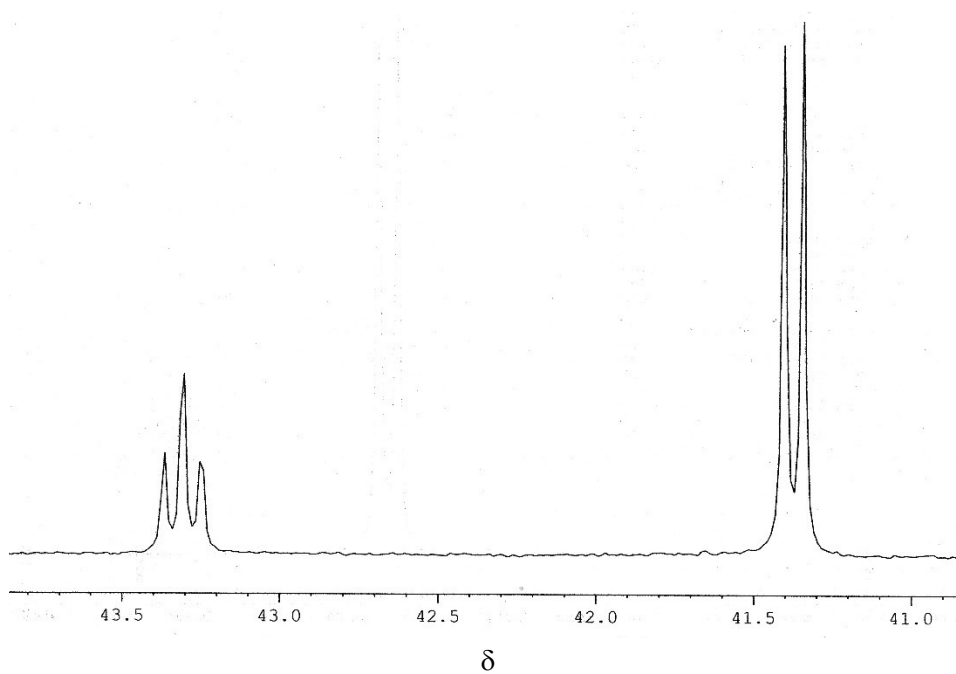

**Fig. S4**  $^{31}\text{P}\{^1\text{H}\}$  NMR of redissolved crystals of **10**.

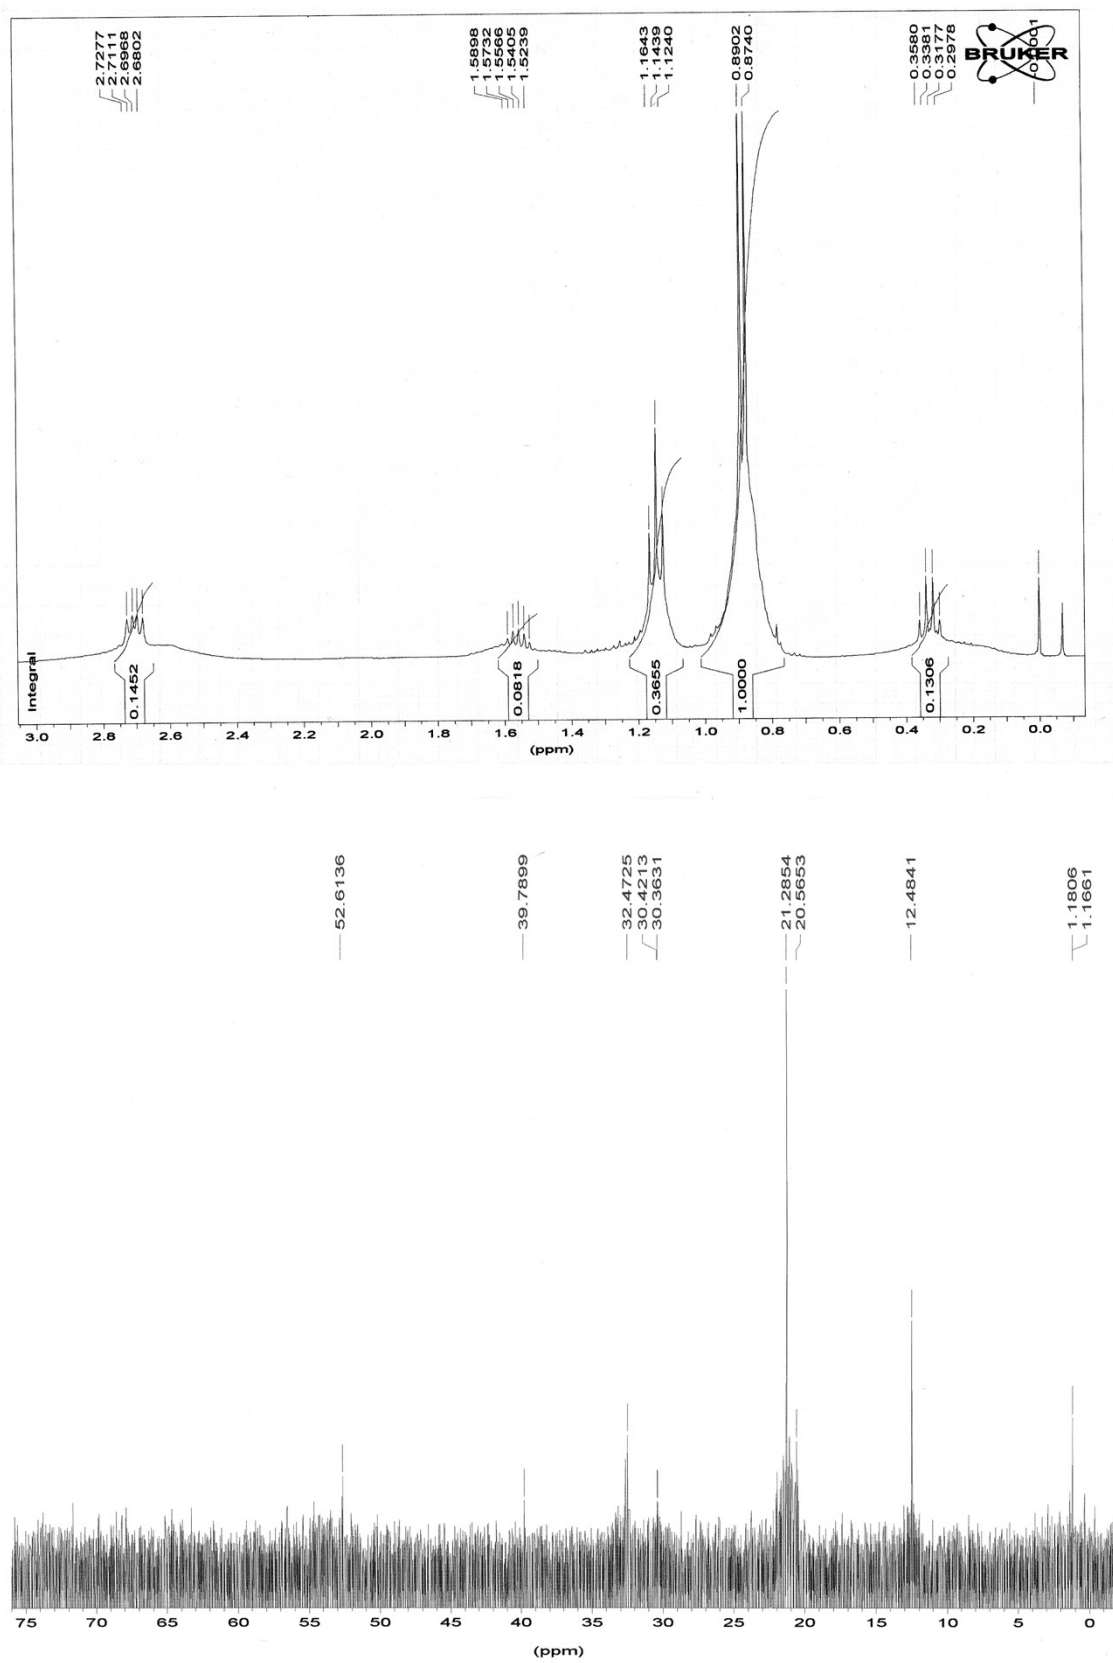

Fig. S5 <sup>1</sup>H NMR (top) and <sup>13</sup>C NMR (bottom) of redissolved crystals of 9.

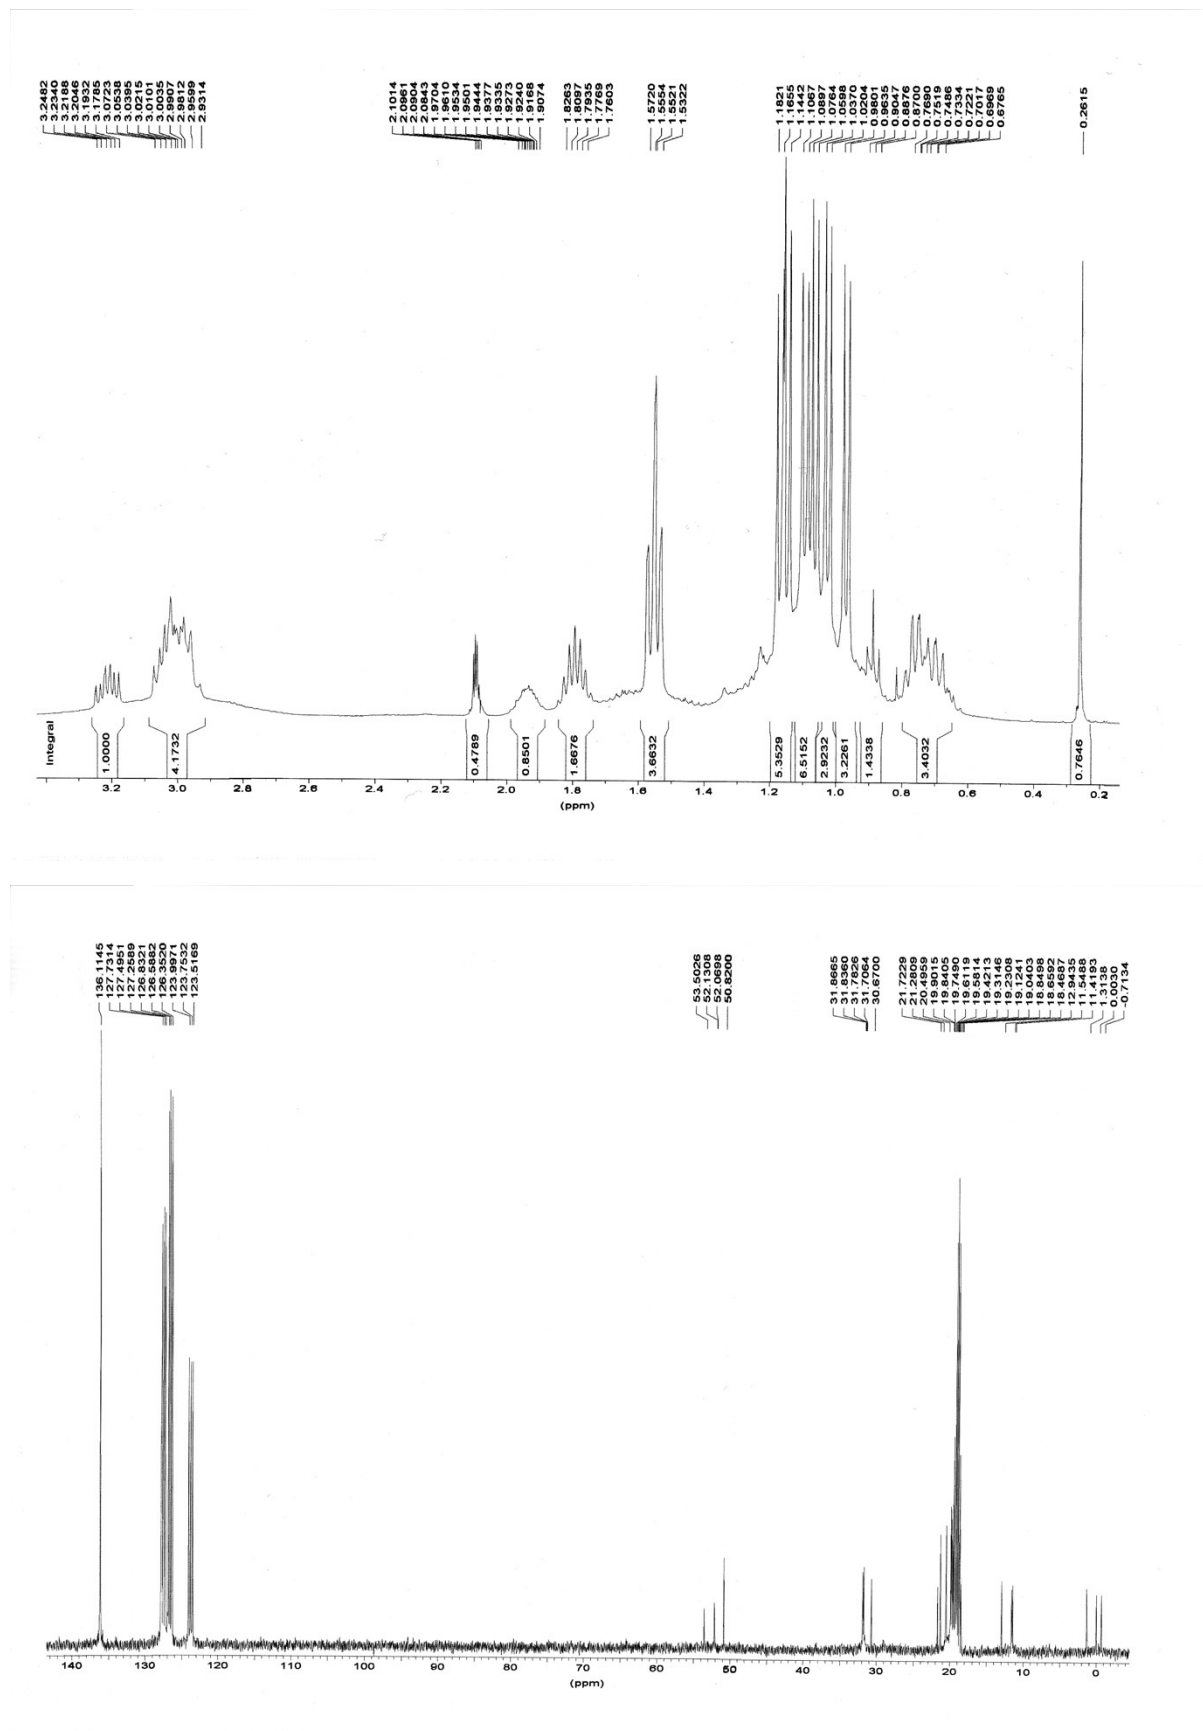

Fig. S6  $^1\text{H}$  NMR (top) and  $^{13}\text{C}$  NMR (bottom) of redissolved crystals of 10.

## X-ray crystallography

Reflections were collected on a Bruker Smart Apex diffractometer at 150 K and a Stoe IPDS at 200 K, respectively, using monochromated MoK $\alpha$  radiation ( $\lambda = 0.71073 \text{ \AA}$ ). All structures were refined against  $F^2$  with full-matrix least-squares using the SHELX programme.<sup>S2</sup> Crystallographic data are listed in Table S1. The crystal structures of **10** contains one molecule of hexane per formula unit. A pseudo-merohedral twin refinement was carried out for **10**. Non-hydrogen atoms were refined anisotropically. H-atoms were fixed in geometrical positions. Disorder was encountered in some alkyl groups and in the hexane molecule. Disordered atom positions were split on two positions and refined with restraints.<sup>S1</sup> Crystal of **8** diffracted weakly which is reflected in the high  $R_{\text{sigma}}$ . It gives nonetheless an adequate model that confirms the connectivity of atoms in the structure. The coverage for crystals is only 91.7 % ; the missing cusp of data due to rotation about one axis in conjunction with low Laue symmetry.

Crystallographic data can be obtained free of charge from The Cambridge Crystallographic Data Centre ([www.ccdc.cam.ac.uk](http://www.ccdc.cam.ac.uk)); deposition numbers are as follows: **5**, CCDC 2383655 ; **6**, CCDC 2383657 ; **7**, CCDC 2383658 ; **8**, CCDC 2383656 ; **9**, CCDC 2383654 ; **10**, CCDC 2383659.

S2 G. M. Sheldrick, *Acta Crystallogr., Sect. A*, 2015, **71**, 3.

**Table S1** Crystallographic data.

|                                      | <b>5</b>                                                                        | <b>6</b>                                                                         | <b>7</b>                                                                         |
|--------------------------------------|---------------------------------------------------------------------------------|----------------------------------------------------------------------------------|----------------------------------------------------------------------------------|
| formula                              | C <sub>36</sub> H <sub>96</sub> N <sub>18</sub> P <sub>6</sub> Zn <sub>12</sub> | C <sub>44</sub> H <sub>110</sub> N <sub>18</sub> P <sub>6</sub> Zn <sub>11</sub> | C <sub>56</sub> H <sub>134</sub> N <sub>18</sub> P <sub>6</sub> Zn <sub>11</sub> |
| MW                                   | 1751.56                                                                         | 1796.38                                                                          | 1964.69                                                                          |
| spacegroup                           | <i>P</i> -1                                                                     | <i>P</i> -1                                                                      | <i>P</i> 2 <sub>1</sub> / <i>n</i>                                               |
| <i>a</i> /Å                          | 11.922(3)                                                                       | 12.380(3)                                                                        | 13.2503(18)                                                                      |
| <i>b</i> /Å                          | 12.490(3)                                                                       | 14.952(3)                                                                        | 28.806(5)                                                                        |
| <i>c</i> /Å                          | 25.336(7)                                                                       | 20.629(4)                                                                        | 22.918(3)                                                                        |
| $\alpha^\circ$                       | 91.175(4)                                                                       | 79.43(3)                                                                         | 90                                                                               |
| $\beta^\circ$                        | 99.758(4)                                                                       | 89.22(3)                                                                         | 96.989(16)                                                                       |
| $\gamma^\circ$                       | 118.034(4)                                                                      | 79.88(3)                                                                         | 90                                                                               |
| <i>V</i> /Å <sup>3</sup>             | 3259.9(15)                                                                      | 3694.7(14)                                                                       | 8683(2)                                                                          |
| <i>Z</i>                             | 2                                                                               | 2                                                                                | 4                                                                                |
| <i>T</i> /K                          | 150(2)                                                                          | 200(2)                                                                           | 200(2)                                                                           |
| <i>d</i> /g cm <sup>-3</sup>         | 1.784                                                                           | 1.615                                                                            | 1.503                                                                            |
| $\mu$ /mm <sup>-1</sup>              | 4.516                                                                           | 3.673                                                                            | 3.133                                                                            |
| $\theta$ (max)                       | 24.4                                                                            | 24.3                                                                             | 24.2                                                                             |
| <i>R</i> <sub>int</sub>              | 0.040                                                                           | 0.078                                                                            | 0.100                                                                            |
| <i>R</i> <sub>sigma</sub>            | 0.102                                                                           | 0.097                                                                            | 0.100                                                                            |
| refl(unique)                         | 10536                                                                           | 11004                                                                            | 13259                                                                            |
| refl(>2 $\sigma$ ( <i>I</i> ))       | 5851                                                                            | 6921                                                                             | 7383                                                                             |
| parameters                           | 676                                                                             | 735                                                                              | 812                                                                              |
| restraints                           | 1200                                                                            | 1856                                                                             | 2139                                                                             |
| <i>R</i> 1(>2 $\sigma$ ( <i>I</i> )) | 0.069                                                                           | 0.059                                                                            | 0.067                                                                            |
| <i>wR</i> 2(all)                     | 0.210                                                                           | 0.148                                                                            | 0.1703                                                                           |



**Table S1** Crystallographic data (continued).

|                                      | <b>8</b>                                                               | <b>9</b>                 | <b>10</b>                                       |
|--------------------------------------|------------------------------------------------------------------------|--------------------------|-------------------------------------------------|
| formula                              | $C_{60}H_{144}N_{18}P_6Zn_{12} \cdot C_{54}H_{136}N_{18}O_3P_6Zn_{13}$ | $C_{36}H_{84}N_9P_3Zn_6$ | $C_{64}H_{148}N_{18}P_6Zn_{10} \cdot C_6H_{14}$ |
| MW                                   | 4233.63                                                                | 1128.25                  | 2095.69                                         |
| spacegroup                           | <i>C2</i>                                                              | <i>P</i> -1              | <i>P2</i> <sub>1</sub> / <i>n</i>               |
| <i>a</i> /Å                          | 26.800(5)                                                              | 11.703(2)                | 13.385(4)                                       |
| <i>b</i> /Å                          | 13.633(2)                                                              | 12.007(3)                | 37.277(10)                                      |
| <i>c</i> /Å                          | 25.325(4)                                                              | 20.205(4)                | 20.034(6)                                       |
| $\alpha$ /°                          | 90                                                                     | 100.408(3)               | 90                                              |
| $\beta$ /°                           | 107.425(5)                                                             | 95.061(4)                | 90.025(5)                                       |
| $\gamma$ /°                          | 90                                                                     | 112.248(3)               | 90                                              |
| <i>V</i> /Å <sup>3</sup>             | 8828(2)                                                                | 2545.8(9)                | 9996(5)                                         |
| <i>Z</i>                             | 2                                                                      | 2                        | 4                                               |
| <i>T</i> /K                          | 150(2)                                                                 | 150(2)                   | 150(2)                                          |
| <i>d</i> /g cm <sup>-3</sup>         | 1.593                                                                  | 1.472                    | 1.393                                           |
| $\mu$ /mm <sup>-1</sup>              | 3.483                                                                  | 2.909                    | 2.494                                           |
| $\theta$ (max)                       | 24.4                                                                   | 25.0                     | 28.0                                            |
| <i>R</i> <sub>int</sub>              | 0.115                                                                  | 0.053                    | 0.060                                           |
| <i>R</i> <sub>sigma</sub>            | 0.297                                                                  | 0.030                    | 0.083                                           |
| refl(unique)                         | 13852                                                                  | 8713                     | 22777                                           |
| refl(>2 $\sigma$ ( <i>I</i> ))       | 5190                                                                   | 7498                     | 18673                                           |
| parameter                            | 881                                                                    | 491                      | 983                                             |
| restraints                           | 2037                                                                   | 0                        | 91                                              |
| <i>R</i> 1(>2 $\sigma$ ( <i>I</i> )) | 0.082                                                                  | 0.047                    | 0.050                                           |
| <i>wR</i> 2(all)                     | 0.218                                                                  | 0.131                    | 0.116                                           |

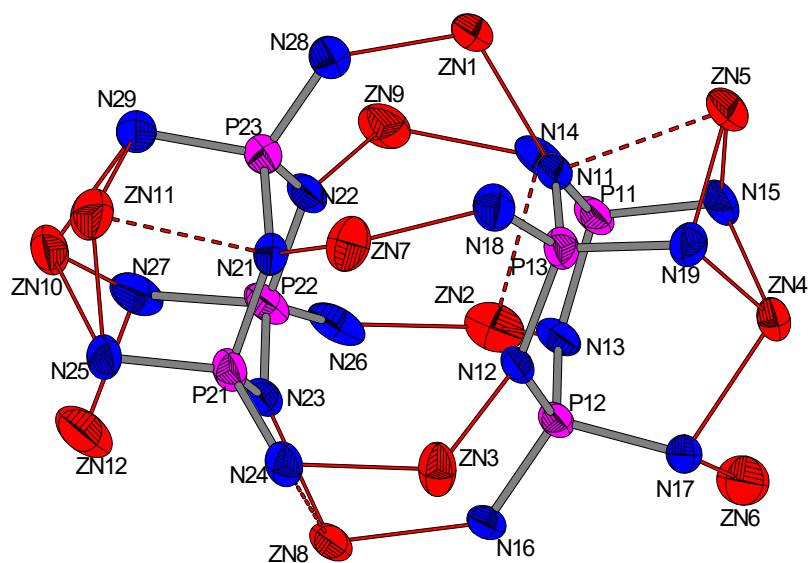

**Fig. S7** Core structure of complex **5** with 30 % probability ellipsoids (methyl substituents and Zn bound ethyl groups are omitted for clarity). Selected bond lengths (Å) and angles (°):

|     |     |           |     |     |           |      |     |           |
|-----|-----|-----------|-----|-----|-----------|------|-----|-----------|
| P11 | N11 | 1.626(8)  | P22 | N26 | 1.599(10) | Zn5  | N19 | 2.167(10) |
| P11 | N13 | 1.630(8)  | P22 | N27 | 1.723(10) | Zn6  | N17 | 1.893(9)  |
| P11 | N14 | 1.622(10) | P23 | N21 | 1.659(9)  | Zn7  | N18 | 1.949(9)  |
| P11 | N15 | 1.640(9)  | P23 | N22 | 1.641(9)  | Zn7  | N21 | 2.043(9)  |
| P12 | N12 | 1.615(8)  | P23 | N28 | 1.572(9)  | Zn8  | N16 | 2.016(8)  |
| P12 | N13 | 1.619(9)  | P23 | N29 | 1.651(9)  | Zn8  | N23 | 2.073(8)  |
| P12 | N16 | 1.602(8)  | Zn1 | N11 | 2.072(8)  | Zn8  | N24 | 2.333(9)  |
| P12 | N17 | 1.700(8)  | Zn1 | N28 | 1.953(8)  | Zn9  | N14 | 2.051(10) |
| P13 | N11 | 1.666(9)  | Zn2 | N13 | 2.065(9)  | Zn9  | N22 | 2.014(8)  |
| P13 | N12 | 1.644(7)  | Zn2 | N14 | 2.400(9)  | Zn10 | N25 | 2.193(9)  |
| P13 | N18 | 1.592(9)  | Zn2 | N26 | 2.038(10) | Zn10 | N27 | 2.076(13) |
| P13 | N19 | 1.657(9)  | Zn3 | N12 | 2.014(7)  | Zn10 | N29 | 2.049(10) |
| P21 | N21 | 1.635(9)  | Zn3 | N24 | 2.049(8)  | Zn11 | N21 | 2.466(7)  |
| P21 | N23 | 1.645(9)  | Zn4 | N15 | 2.190(10) | Zn11 | N25 | 2.112(10) |
| P21 | N24 | 1.629(9)  | Zn4 | N17 | 2.124(8)  | Zn11 | N29 | 2.158(10) |
| P21 | N25 | 1.626(8)  | Zn4 | N19 | 2.059(9)  | Zn12 | N27 | 1.902(9)  |
| P22 | N22 | 1.621(8)  | Zn5 | N11 | 2.392(7)  |      |     |           |
| P22 | N23 | 1.637(8)  | Zn5 | N15 | 2.079(10) |      |     |           |

|     |     |     |          |     |     |     |          |     |     |     |          |
|-----|-----|-----|----------|-----|-----|-----|----------|-----|-----|-----|----------|
| P11 | N11 | P13 | 120.0(5) | N16 | P12 | N13 | 116.3(5) | N25 | P21 | N23 | 111.7(5) |
| P12 | N12 | P13 | 119.6(4) | N12 | P12 | N17 | 110.5(4) | N25 | P21 | N24 | 116.7(4) |
| P12 | N13 | P11 | 122.2(5) | N13 | P12 | N17 | 101.7(4) | N26 | P22 | N22 | 105.5(4) |
| P21 | N21 | P23 | 119.9(5) | N16 | P12 | N17 | 109.8(4) | N22 | P22 | N23 | 112.8(4) |
| P22 | N22 | P23 | 119.2(5) | N12 | P13 | N11 | 108.4(4) | N26 | P22 | N23 | 116.6(5) |
| P22 | N23 | P21 | 119.5(5) | N18 | P13 | N11 | 113.9(5) | N22 | P22 | N27 | 109.7(5) |
| N14 | P11 | N11 | 113.4(5) | N19 | P13 | N11 | 100.3(5) | N23 | P22 | N27 | 100.9(4) |
| N11 | P11 | N13 | 110.5(4) | N18 | P13 | N12 | 107.3(4) | N26 | P22 | N27 | 111.3(6) |
| N14 | P11 | N13 | 102.8(5) | N12 | P13 | N19 | 113.9(4) | N22 | P23 | N21 | 108.2(4) |

|     |     |     |              |     |     |     |              |     |     |     |              |
|-----|-----|-----|--------------|-----|-----|-----|--------------|-----|-----|-----|--------------|
| N11 | P11 | N15 | 100.7(5<br>) | N18 | P13 | N19 | 113.0(5<br>) | N28 | P23 | N21 | 112.8(5<br>) |
| N13 | P11 | N15 | 112.6(5<br>) | N24 | P21 | N21 | 112.5(5<br>) | N29 | P23 | N21 | 101.0(4<br>) |
| N14 | P11 | N15 | 117.0(5<br>) | N25 | P21 | N21 | 101.7(4<br>) | N28 | P23 | N22 | 108.1(5<br>) |
| N16 | P12 | N12 | 107.3(4<br>) | N21 | P21 | N23 | 111.7(4<br>) | N22 | P23 | N29 | 113.3(5<br>) |
| N12 | P12 | N13 | 111.2(4<br>) | N24 | P21 | N23 | 102.8(4<br>) | N28 | P23 | N29 | 113.3(5<br>) |

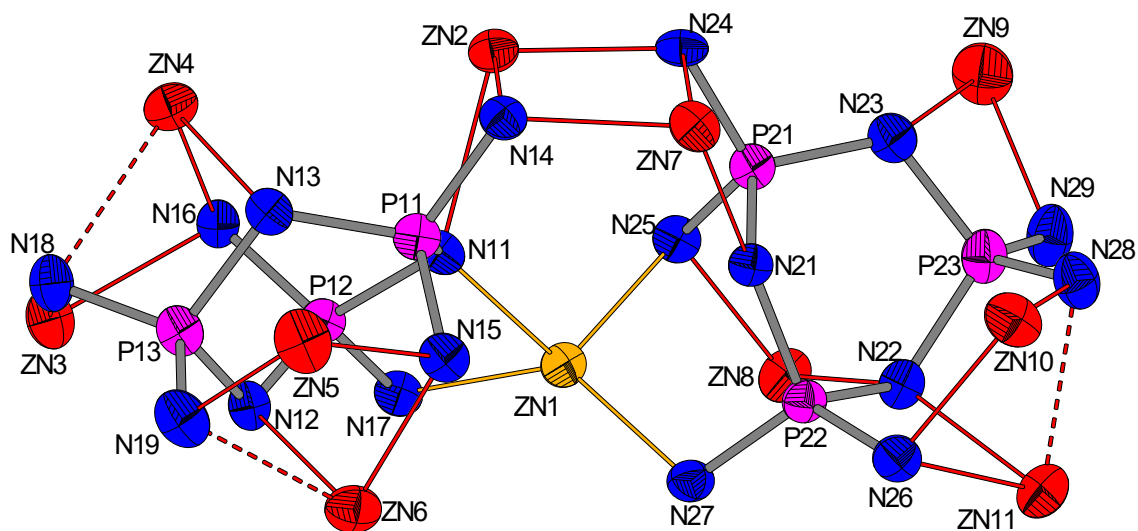

**Fig. S8** Core structure of complex **6** with 30 % probability ellipsoids (ethyl substituents and Zn bound ethyl groups are omitted for clarity, Zn atoms in red are part of EtZn moieties). Selected bond lengths (Å) and angles (°):

|     |     |          |     |     |          |      |     |          |
|-----|-----|----------|-----|-----|----------|------|-----|----------|
| P11 | N11 | 1.671(5) | P22 | N27 | 1.588(6) | Zn5  | N15 | 2.177(6) |
|     |     | 1.661(6) |     |     | 1.639(6) | Zn5  | N19 | 2.001(7) |
| P11 | N13 | 1.637(6) | P22 | N21 | 1.640(7) | Zn6  | N12 | 2.123(6) |
|     |     | 1.649(7) | P23 | N23 | 1.645(7) | Zn6  | N15 | 2.126(6) |
| P11 | N15 | 1.682(6) | P23 | N28 | 1.600(7) | Zn6  | N19 | 2.417(7) |
|     |     | 1.641(6) | P23 | N29 | 1.671(7) | Zn7  | N14 | 2.120(6) |
| P12 | N11 | 1.647(6) | P23 | N22 | 2.184(6) | Zn7  | N21 | 2.183(6) |
|     |     | 1.604(6) | Zn1 | N11 | 1.968(6) | Zn7  | N24 | 2.242(6) |
| P12 | N17 | 1.673(6) | Zn1 | N17 | 2.114(6) | Zn7  | N24 | 2.059(6) |
|     |     | 1.665(6) | Zn1 | N25 | 2.002(6) | Zn8  | N22 | 2.064(6) |
| P13 | N12 | 1.604(7) | Zn1 | N27 | 2.276(6) | Zn8  | N25 | 2.184(6) |
|     |     | 1.621(7) | Zn2 | N11 | 2.153(6) | Zn9  | N23 | 1.955(8) |
| P13 | N19 | 1.641(6) | Zn2 | N14 | 2.091(6) | Zn9  | N29 | 2.082(6) |
|     |     | 1.629(6) | Zn2 | N24 | 2.139(6) | Zn10 | N26 | 2.011(7) |
| P21 | N21 | 1.632(6) | Zn3 | N16 | 2.006(6) | Zn10 | N28 | 2.178(6) |
|     |     | 1.681(6) | Zn3 | N18 | 2.177(6) | Zn11 | N22 | 2.172(6) |
| P21 | N23 | 1.702(6) | Zn4 | N13 | 2.151(6) | Zn11 | N26 | 2.345(7) |
|     |     | 1.627(6) | Zn4 | N16 | 2.412(7) | Zn11 | N28 |          |
| P22 | N22 |          | Zn4 | N18 |          |      |     |          |
| P22 | N26 |          |     |     |          |      |     |          |

|     |     |     |          |     |     |     |          |     |     |     |          |
|-----|-----|-----|----------|-----|-----|-----|----------|-----|-----|-----|----------|
| P11 | N11 | P12 | 112.1(3) | N12 | P12 | N16 | 102.8(3) | N21 | P22 | N22 | 106.7(3) |
| P12 | N12 | P13 | 116.0(4) | N17 | P12 | N16 | 117.8(3) | N26 | P22 | N22 | 100.0(3) |

|     |     |     |         |     |     |     |         |     |     |     |         |
|-----|-----|-----|---------|-----|-----|-----|---------|-----|-----|-----|---------|
|     |     |     | )       |     |     |     | )       |     |     |     | )       |
| P11 | N13 | P13 | 114.8(4 | N13 | P13 | N12 | 104.9(3 | N27 | P22 | N22 | 109.7(3 |
|     |     |     | )       |     |     |     | )       |     |     |     | )       |
| P22 | N21 | P21 | 115.7(3 | N18 | P13 | N12 | 107.4(3 | N27 | P22 | N26 | 118.1(4 |
|     |     |     | )       |     |     |     | )       |     |     |     | )       |
| P23 | N22 | P22 | 116.6(4 | N19 | P13 | N12 | 107.6(4 | N23 | P23 | N22 | 109.2(3 |
|     |     |     | )       |     |     |     | )       |     |     |     | )       |
| P21 | N23 | P23 | 115.5(4 | N18 | P13 | N13 | 109.3(4 | N28 | P23 | N22 | 100.5(4 |
|     |     |     | )       |     |     |     | )       |     |     |     | )       |
| N13 | P11 | N11 | 107.8(3 | N19 | P13 | N13 | 107.4(3 | N29 | P23 | N22 | 112.5(4 |
|     |     |     | )       |     |     |     | )       |     |     |     | )       |
| N14 | P11 | N11 | 100.0(3 | N18 | P13 | N19 | 119.4(4 | N29 | P23 | N23 | 99.9(4) |
|     |     |     | )       |     |     |     | )       |     |     |     | )       |
| N15 | P11 | N11 | 116.6(3 | N23 | P21 | N21 | 109.9(3 | N23 | P23 | N28 | 120.1(4 |
|     |     |     | )       |     |     |     | )       |     |     |     | )       |
| N14 | P11 | N13 | 114.1(3 | N24 | P21 | N21 | 103.2(3 | N29 | P23 | N28 | 115.1(4 |
|     |     |     | )       |     |     |     | )       |     |     |     | )       |
| N15 | P11 | N13 | 103.4(3 | N23 | P21 | N24 | 113.3(3 | N17 | Zn1 | N11 | 73.5(2) |
|     |     |     | )       |     |     |     | )       |     |     |     | )       |
| N14 | P11 | N15 | 115.1(3 | N21 | P21 | N25 | 103.8(3 | N25 | Zn1 | N11 | 104.9(2 |
|     |     |     | )       |     |     |     | )       |     |     |     | )       |
| N12 | P12 | N11 | 109.2(3 | N23 | P21 | N25 | 111.1(3 | N27 | Zn1 | N11 | 127.2(2 |
|     |     |     | )       |     |     |     | )       |     |     |     | )       |
| N16 | P12 | N11 | 113.2(3 | N24 | P21 | N25 | 114.7(3 | N17 | Zn1 | N25 | 118.5(2 |
|     |     |     | )       |     |     |     | )       |     |     |     | )       |
| N17 | P12 | N11 | 115.7(3 | N26 | P22 | N21 | 115.7(3 | N27 | Zn1 | N25 | 99.3(2) |
|     |     |     | )       |     |     |     | )       |     |     |     | )       |
| N17 | P12 | N11 | 98.5(3) | N27 | P22 | N21 | 105.9(3 | N17 | Zn1 | N27 | 131.4(3 |
|     |     |     | )       |     |     |     | )       |     |     |     | )       |
| N17 | P12 | N12 | 115.6(3 |     |     |     | )       |     |     |     | )       |
|     |     |     | )       |     |     |     | )       |     |     |     | )       |

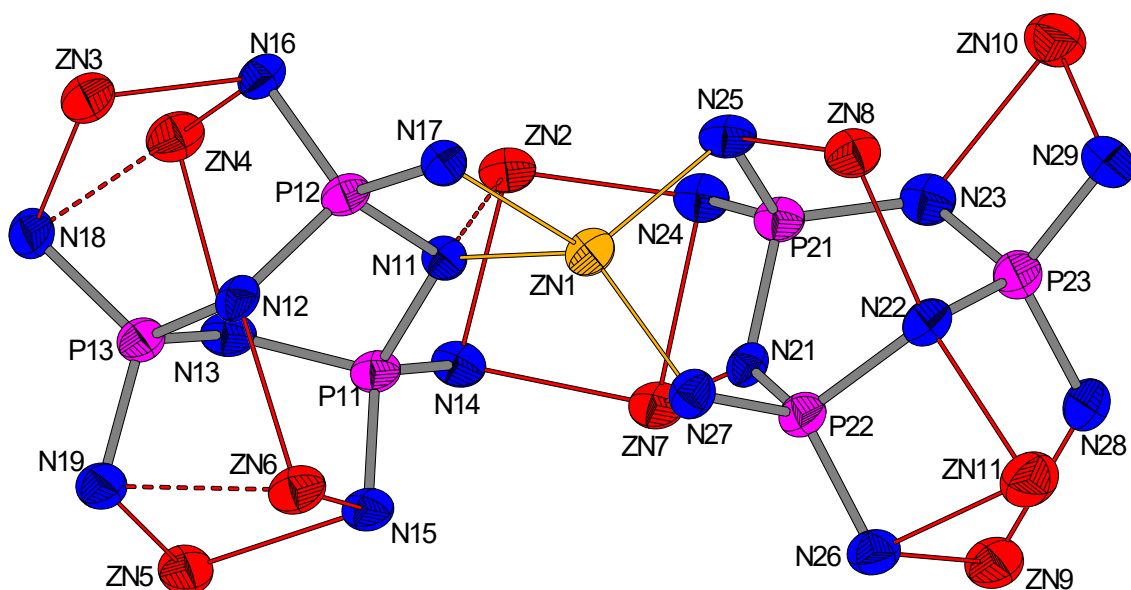

**Fig. S9** Core structure of complex **6** with 30 % probability ellipsoids (propyl substituents and Zn bound ethyl groups are omitted for clarity, Zn atoms in red are part of EtZn moieties). Selected bond lengths (Å) and angles (°):

|     |     |          |     |     |          |      |     |          |
|-----|-----|----------|-----|-----|----------|------|-----|----------|
| P11 | N11 | 1.670(7) | P22 | N26 | 1.646(7) | Zn5  | N15 | 2.193(7) |
|     |     | )        |     |     | )        |      |     | )        |
| P11 | N13 | 1.627(8) | P22 | N27 | 1.602(7) | Zn5  | N19 | 2.008(7) |
|     |     | )        |     |     | )        |      |     | )        |
|     |     | 1.650(7) | P23 | N22 | 1.677(8) | Zn6  | N12 | 2.140(7) |
| P11 | N14 | )        |     |     | )        |      |     | )        |
|     |     | 1.614(8) | P23 | N23 | 1.656(9) | Zn6  | N15 | 2.130(7) |
| P11 | N15 | )        |     |     | )        |      |     | )        |
|     |     | 1.690(6) | P23 | N28 | 1.630(8) | Zn6  | N19 | 2.411(8) |
| P12 | N11 | )        |     |     | )        |      |     | )        |
|     |     | 1.645(7) | P23 | N29 | 1.592(8) | Zn7  | N14 | 2.162(7) |
| P12 | N12 | )        |     |     | )        |      |     | )        |
|     |     | 1.654(7) | Zn1 | N11 | 2.171(7) | Zn7  | N21 | 2.150(7) |
| P12 | N16 | )        |     |     | )        |      |     | )        |
|     |     | 1.578(7) | Zn1 | N17 | 1.972(6) | Zn7  | N24 | 2.257(7) |
| P12 | N17 | )        |     |     | )        |      |     | )        |
|     |     | 1.649(7) | Zn1 | N25 | 2.107(7) | Zn8  | N22 | 2.086(7) |
| P13 | N12 | )        |     |     | )        |      |     | )        |
|     |     | 1.687(7) | Zn1 | N27 | 1.977(7) | Zn8  | N25 | 2.041(7) |
| P13 | N13 | )        |     |     | )        |      |     | )        |
|     |     | 1.626(8) | Zn1 | N27 | 2.319(7) | Zn8  | N25 | 2.103(7) |
| P13 | N18 | )        |     |     | )        |      |     | )        |
|     |     | 1.621(8) | Zn2 | N11 | 2.141(7) | Zn9  | N26 | 1.966(8) |
| P13 | N19 | )        |     |     | )        |      |     | )        |
|     |     | 1.624(7) | Zn2 | N14 | 2.092(8) | Zn9  | N28 | 2.175(8) |
| P21 | N21 | )        |     |     | )        |      |     | )        |
|     |     | 1.610(8) | Zn2 | N24 | 2.126(7) | Zn10 | N23 | 1.944(9) |
| P21 | N23 | )        |     |     | )        |      |     | )        |
|     |     | 1.632(7) | Zn3 | N16 | 2.014(7) | Zn10 | N29 | 2.125(7) |
| P21 | N24 | )        |     |     | )        |      |     | )        |
|     |     | 1.686(6) | Zn3 | N18 | 2.185(7) | Zn11 | N22 | 2.132(8) |
| P21 | N25 | )        |     |     | )        |      |     | )        |
|     |     | 1.645(7) | Zn4 | N13 | 2.135(7) | Zn11 | N26 | )        |
| P22 | N21 | )        |     |     | )        |      |     | )        |
|     |     | 1.691(8) | Zn4 | N16 | 2.413(8) |      |     | )        |
| P22 | N22 | )        |     |     | )        |      |     | )        |

|     |     |     |          |     |     |     |          |     |     |     |          |
|-----|-----|-----|----------|-----|-----|-----|----------|-----|-----|-----|----------|
| P11 | N11 | P12 | 111.9(4) | N12 | P12 | N16 | 102.7(4) | N26 | P22 | N22 | 98.6(4)  |
|     |     |     | )        |     |     |     | )        |     |     |     | )        |
|     |     |     | 115.7(4) |     |     |     | 117.3(4) |     |     |     | 111.0(4) |
| P12 | N12 | P13 | )        | N17 | P12 | N16 | )        | N27 | P22 | N22 | )        |
|     |     |     | )        |     |     |     | )        |     |     |     | )        |
| P11 | N13 | P13 | 115.8(5) | N18 | P13 | N12 | 106.8(4) | N21 | P22 | N26 | 116.8(4) |

|     |     |     |          |     |     |     |          |     |     |     |          |
|-----|-----|-----|----------|-----|-----|-----|----------|-----|-----|-----|----------|
|     |     |     | )        |     |     |     | )        |     |     |     | )        |
| P21 | N21 | P22 | 115.3(4) | N19 | P13 | N12 | 108.8(4) | N27 | P22 | N26 | 117.4(4) |
|     |     |     | )        |     |     |     | )        |     |     |     | )        |
| P23 | N22 | P22 | 117.8(4) | N12 | P13 | N13 | 104.8(4) | N23 | P23 | N22 | 108.3(4) |
|     |     |     | )        |     |     |     | )        |     |     |     | )        |
| P21 | N23 | P23 | 115.1(5) | N18 | P13 | N13 | 109.9(4) | N28 | P23 | N22 | 102.4(4) |
|     |     |     | )        |     |     |     | )        |     |     |     | )        |
| N13 | P11 | N11 | 107.8(3) | N19 | P13 | N13 | 106.7(4) | N29 | P23 | N22 | 112.0(4) |
|     |     |     | )        |     |     |     | )        |     |     |     | )        |
| N14 | P11 | N11 | 100.4(3) | N19 | P13 | N18 | 119.0(4) | N28 | P23 | N23 | 119.1(4) |
|     |     |     | )        |     |     |     | )        |     |     |     | )        |
| N15 | P11 | N11 | 117.1(4) | N23 | P21 | N21 | 111.0(4) | N29 | P23 | N23 | 99.2(4)  |
|     |     |     | )        |     |     |     | )        |     |     |     | )        |
| N15 | P11 | N13 | 102.4(4) | N21 | P21 | N24 | 102.5(4) | N29 | P23 | N28 | 116.0(4) |
|     |     |     | )        |     |     |     | )        |     |     |     | )        |
| N13 | P11 | N14 | 114.6(4) | N23 | P21 | N24 | 112.2(4) | N17 | Zn1 | N11 | 73.5(2)  |
|     |     |     | )        |     |     |     | )        |     |     |     | )        |
| N15 | P11 | N14 | 114.9(4) | N21 | P21 | N25 | 104.6(3) | N25 | Zn1 | N11 | 103.0(3) |
|     |     |     | )        |     |     |     | )        |     |     |     | )        |
| N12 | P12 | N11 | 109.7(3) | N23 | P21 | N25 | 110.5(4) | N27 | Zn1 | N11 | 127.4(3) |
|     |     |     | )        |     |     |     | )        |     |     |     | )        |
| N16 | P12 | N11 | 113.2(4) | N24 | P21 | N25 | 115.4(4) | N17 | Zn1 | N25 | 115.6(3) |
|     |     |     | )        |     |     |     | )        |     |     |     | )        |
| N17 | P12 | N11 | 98.8(3)  | N27 | P22 | N21 | 106.1(3) | N27 | Zn1 | N25 | 101.6(3) |
|     |     |     | )        |     |     |     | )        |     |     |     | )        |
| N17 | P12 | N12 | 115.4(4) | N21 | P22 | N22 | 106.2(4) | N17 | Zn1 | N27 | 132.2(3) |
|     |     |     | )        |     |     |     | )        |     |     |     | )        |

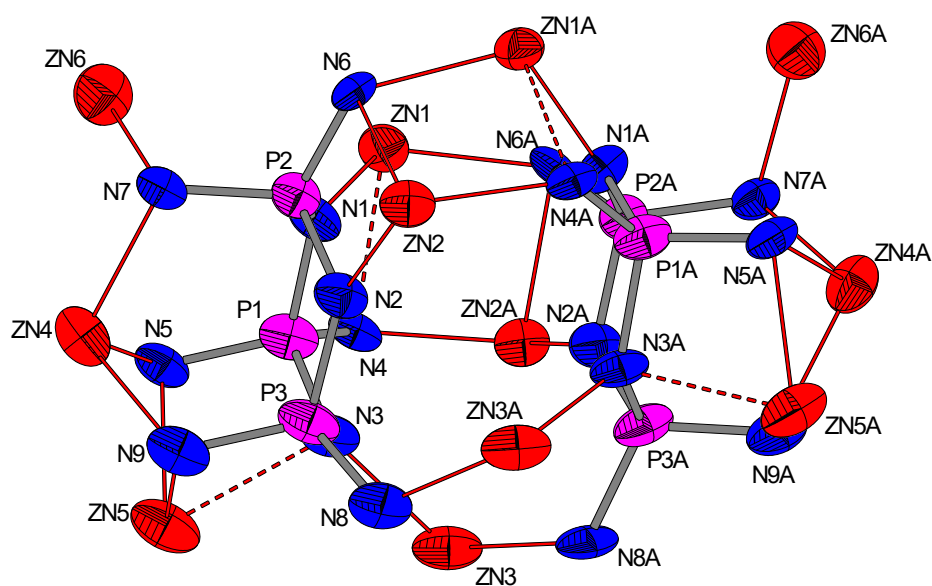

**Fig. S10** Core structure of complex **8a** with 30 % probability ellipsoids (propyl substituents and Zn bound ethyl groups are omitted for clarity, Zn atoms in red are part of EtZn moieties). Selected bond lengths (Å) and angles (°):

|    |    |         |     |     |         |     |     |         |
|----|----|---------|-----|-----|---------|-----|-----|---------|
| P1 | N1 | 1.63(2) | P3  | N3  | 1.68(2) | Zn3 | N3  | 2.14(3) |
|    |    | )       |     |     | )       |     |     | )       |
| P1 | N3 | 1.65(2) | P3  | N8  | 1.60(2) | Zn3 | N8a | 2.00(3) |
|    |    | )       |     |     | )       |     |     | )       |
| P1 | N4 | 1.64(2) | P3  | N9  | 1.65(2) | Zn4 | N5  | 2.17(2) |
|    |    | )       |     |     | )       |     |     | )       |
| P1 | N5 | 1.61(2) | Zn1 | N1  | 2.06(2) | Zn4 | N7  | 2.17(2) |
|    |    | )       |     |     | )       |     |     | )       |
| P2 | N1 | 1.66(2) | Zn1 | N4  | 2.31(2) | Zn4 | N9  | 2.05(3) |
|    |    | )       |     |     | )       |     |     | )       |
| P2 | N2 | 1.61(3) | Zn1 | N6a | 2.11(2) | Zn5 | N3  | 2.33(2) |
|    |    | )       |     |     | )       |     |     | )       |
| P2 | N6 | 1.62(2) | Zn2 | N2  | 2.06(2) | Zn5 | N5  | 2.16(2) |
|    |    | )       |     |     | )       |     |     | )       |
| P2 | N7 | 1.66(2) | Zn2 | N4a | 2.08(2) | Zn5 | N9  | 2.15(2) |
|    |    | )       |     |     | )       |     |     | )       |
| P3 | N2 | 1.68(3) | Zn2 | N6  | 2.30(2) | Zn6 | N7  | 1.98(2) |
|    |    | )       |     |     | )       |     |     | )       |

|     |     |     |           |     |     |     |           |      |      |      |           |
|-----|-----|-----|-----------|-----|-----|-----|-----------|------|------|------|-----------|
| P11 | N11 | P12 | 130.5(15) | N11 | P12 | N12 | 110.5(12) | N19  | P13  | N12  | 99.2(11)  |
|     |     | )   | )         |     |     | )   | )         |      |      | )    | )         |
| P12 | N12 | P13 | 127.8(14) | N16 | P12 | N11 | 118.3(12) | N19  | P13  | N13  | 114.1(12) |
|     |     | )   | )         |     |     | )   | )         |      |      | )    | )         |
| P11 | N13 | P13 | 123.7(14) | N16 | P12 | N12 | 103.7(12) | N19  | P13  | N18  | 114.0(11) |
|     |     | )   | )         |     |     | )   | )         |      |      | )    | )         |
| N11 | P11 | N13 | 113.7(13) | N16 | P12 | N17 | 107.5(13) | Zn11 | O1   | Zn11 | 112.8(12) |
|     |     | )   | )         |     |     | )   | )         |      |      | a    | )         |
| N11 | P11 | N14 | 102.9(12) | N17 | P12 | N11 | 104.5(13) | Zn12 | O2   | Zn11 | 111.9(8)  |
|     |     | )   | )         |     |     | )   | )         |      |      |      | )         |
| N11 | P11 | N15 | 112.0(12) | N17 | P12 | N12 | 112.6(14) | O1   | Zn11 | O2   | 127.3(8)  |
|     |     | )   | )         |     |     | )   | )         |      |      | O2a  | 128.8(10) |
| N14 | P11 | N13 | 113.2(12) | N12 | P13 | N13 | 112.9(11) |      |      |      | )         |
|     |     | )   | )         |     |     | )   | )         |      |      |      | )         |
| N14 | P11 | N15 | 113.1(13) | N18 | P13 | N12 | 115.7(12) |      |      |      | )         |
|     |     | )   | )         |     |     | )   | )         |      |      |      | )         |
| N15 | P11 | N13 | 102.4(12) | N18 | P13 | N13 | 101.7(11) |      |      |      | )         |
|     |     | )   | )         |     |     | )   | )         |      |      |      | )         |



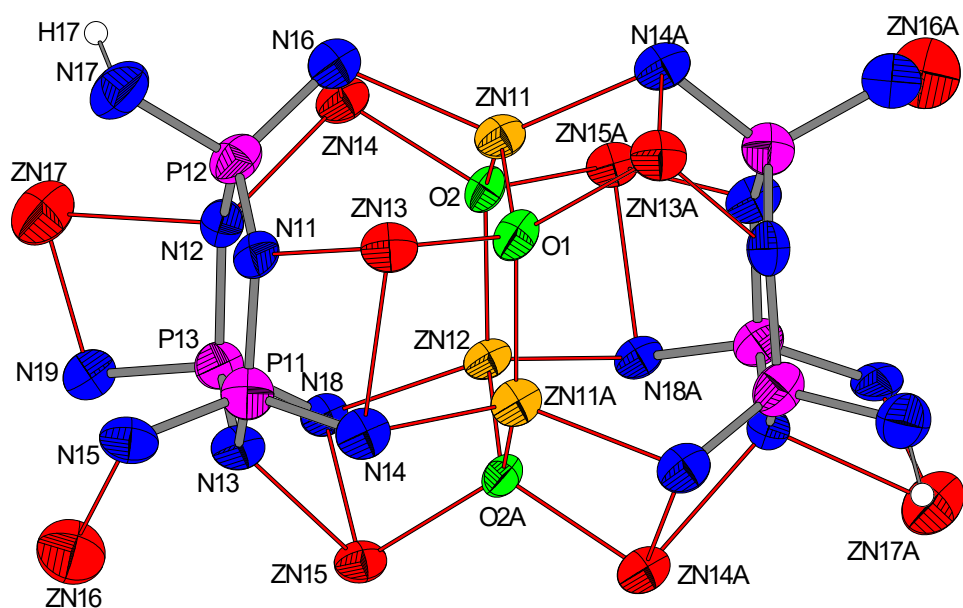

**Fig. S11** Core structure of complex **8b** with 30 % probability ellipsoids (propyl substituents and Zn bound ethyl groups are omitted for clarity, Zn atoms in red are part of EtZn moieties). Selected bond lengths (Å) and angles (°):

|     |     |         |      |      |           |      |     |           |
|-----|-----|---------|------|------|-----------|------|-----|-----------|
| P11 | N11 | 1.59(2) | Zn11 | N14a | 2.04(2)   | Zn14 | N12 | 2.22(2)   |
|     |     | )       |      |      | )         |      |     | )         |
| P11 | N13 | 1.65(2) | Zn11 | N16  | 2.09(2)   | Zn14 | N16 | 2.24(2)   |
|     |     | )       |      |      | 1.968(14) |      |     | 1.967(17) |
| P11 | N14 | 1.61(2) | Zn11 | O1   | )         | Zn14 | O2  | )         |
|     |     | )       |      |      | 1.989(17) |      |     | )         |
| P11 | N15 | 1.62(2) | Zn11 | O2   | )         | Zn15 | N13 | 2.16(2)   |
|     |     | )       |      |      | )         |      |     | )         |
|     |     | 1.63(3) |      |      | )         |      |     | )         |
| P12 | N11 | )       | Zn12 | N18a | 2.05(2)   | Zn15 | N18 | 2.23(2)   |
|     |     | )       |      |      | )         |      |     | 1.978(18) |
| P12 | N12 | 1.64(2) | Zn12 | N18  | 2.05(2)   | Zn15 | O2a | )         |
|     |     | )       |      |      | 1.957(18) |      |     | )         |
| P12 | N16 | 1.59(2) | Zn12 | O2   | )         | Zn16 | N13 | 2.48(2)   |
|     |     | )       |      |      | 1.957(18) |      |     | )         |
| P12 | N17 | 1.62(2) | Zn12 | O2a  | )         | Zn16 | N15 | 1.88(2)   |
|     |     | )       |      |      | )         |      |     | )         |
|     |     | 1.66(2) |      |      | )         |      |     | )         |
| P13 | N12 | )       | Zn13 | N11  | 2.17(2)   | Zn17 | N12 | 2.28(2)   |
|     |     | )       |      |      | )         |      |     | )         |
| P13 | N13 | 1.69(2) | Zn13 | N14  | 2.30(2)   | Zn17 | N19 | 1.94(2)   |
|     |     | )       |      |      | 1.984(14) |      |     | )         |
| P13 | N18 | 1.66(2) | Zn13 | O1   | )         |      |     | )         |
|     |     | )       |      |      | 1.984(14) |      |     | )         |
| P13 | N19 | 1.63(2) | Zn13 | O1a  | )         |      |     | )         |
|     |     | )       |      |      | )         |      |     | )         |

|     |     |     |           |     |     |     |           |      |      |      |           |
|-----|-----|-----|-----------|-----|-----|-----|-----------|------|------|------|-----------|
| P11 | N11 | P12 | 130.5(15) | N11 | P12 | N12 | 110.5(12) | N19  | P13  | N12  | 99.2(11)  |
|     |     | )   | )         |     |     | )   | )         |      |      |      | 114.1(12) |
| P12 | N12 | P13 | 127.8(14) | N16 | P12 | N11 | 118.3(12) | N19  | P13  | N13  | )         |
|     |     | )   | )         |     |     | )   | )         |      |      |      | 114.0(11) |
| P11 | N13 | P13 | 123.7(14) | N16 | P12 | N12 | 103.7(12) | N19  | P13  | N18  | )         |
|     |     | )   | )         |     |     | )   | )         |      |      |      | 112.8(12) |
| P11 | N13 | P13 | 113.7(13) | N16 | P12 | N17 | 107.5(13) | Zn11 | O1   | a    | )         |
|     |     | )   | )         |     |     | )   | )         |      |      |      | )         |
| N11 | P11 | N13 | 102.9(12) | N16 | P12 | N11 | 104.5(13) | Zn12 | O2   | Zn11 | 111.9(8)  |
|     |     | )   | )         |     |     | )   | )         |      |      |      | )         |
| N11 | P11 | N14 | 112.0(12) | N17 | P12 | N11 | 112.6(14) | O1   | Zn11 | O2   | 127.3(8)  |
|     |     | )   | )         |     |     | )   | )         |      |      |      | 128.8(10) |
| N11 | P11 | N15 | 113.2(12) | N17 | P12 | N12 | 112.9(11) | O2   | Zn12 | O2a  | )         |
|     |     | )   | )         |     |     | )   | )         |      |      |      | )         |
| N14 | P11 | N13 | 113.1(13) | N12 | P13 | N13 | 115.7(12) |      |      |      | )         |
|     |     | )   | )         |     |     | )   | )         |      |      |      | )         |
| N14 | P11 | N15 | )         | N18 | P13 | N12 | )         |      |      |      | )         |
|     |     | )   | )         |     |     | )   | )         |      |      |      | )         |
| N15 | P11 | N13 | 102.4(12) | N18 | P13 | N13 | 101.7(11) |      |      |      | )         |
|     |     | )   | )         |     |     | )   | )         |      |      |      | )         |

| ) | ) |

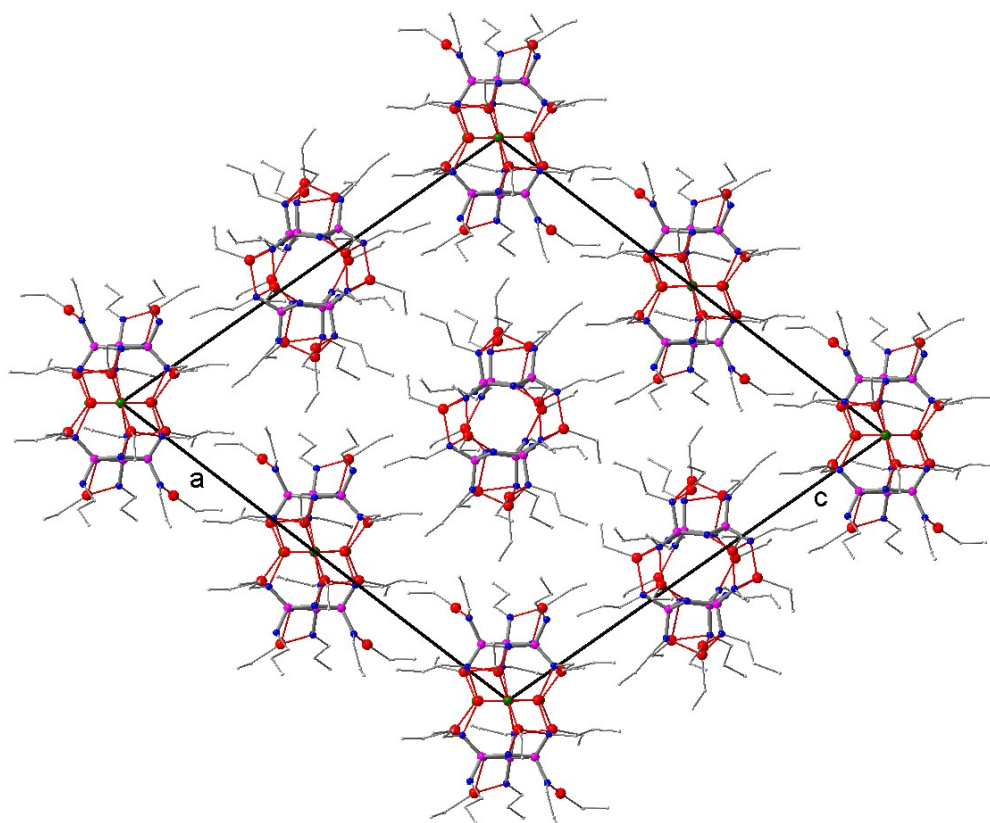

**Fig. S12** Unit cell of co-crystal **8** viewed along the b-axis.

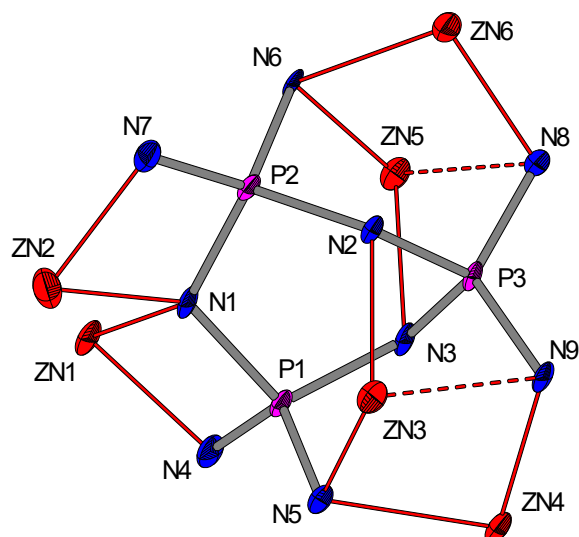

**Fig. S13** Core structure of complex **6** with 30 % probability ellipsoids (isopropyl substituents and Zn bound ethyl groups are omitted for clarity). Selected bond lengths (Å) and angles (°):

|    |    |          |     |    |          |     |    |          |
|----|----|----------|-----|----|----------|-----|----|----------|
| P1 | N1 | 1.671(3) | P3  | N3 | 1.656(3) | Zn3 | N9 | 2.306(3) |
|    |    | )        |     |    | )        |     |    | )        |
|    |    | 1.649(3) |     |    | 1.625(3) | Zn4 | N5 | 2.122(3) |
| P1 | N3 | )        | P3  | N8 | )        |     |    | )        |
|    |    | 1.599(3) |     |    | 1.628(3) | Zn4 | N9 | 2.057(3) |
| P1 | N4 | )        | P3  | N9 | )        |     |    | )        |
|    |    | 1.653(3) |     |    | 2.231(3) | Zn5 | N3 | 2.136(3) |
| P1 | N5 | )        | Zn1 | N1 | )        |     |    | )        |
|    |    | 1.670(3) |     |    | 1.920(3) | Zn5 | N6 | 2.235(3) |
| P2 | N1 | )        | Zn1 | N4 | )        |     |    | )        |
|    |    | 1.653(3) |     |    | 2.248(3) | Zn5 | N8 | 2.296(3) |
| P2 | N2 | )        | Zn2 | N1 | )        |     |    | )        |
|    |    | 1.655(3) |     |    | 1.920(3) | Zn6 | N6 | 2.091(3) |
| P2 | N6 | )        | Zn2 | N7 | )        |     |    | )        |
|    |    | 1.606(3) |     |    | 2.132(3) | Zn6 | N8 | 2.069(3) |
| P2 | N7 | )        | Zn3 | N2 | )        |     |    | )        |
|    |    | 1.660(3) |     |    | 2.179(3) |     |    | )        |
| P3 | N2 | )        | Zn3 | N5 | )        |     |    | )        |

|    |    |    |            |    |     |    |            |    |     |    |           |
|----|----|----|------------|----|-----|----|------------|----|-----|----|-----------|
| P2 | N1 | P1 | 114.58(17) | N7 | P2  | N1 | 98.80(16)  | N7 | Zn2 | N1 | 72.80(12) |
|    |    |    | )          |    |     |    | )          |    |     |    | )         |
| P2 | N2 | P3 | 115.58(18) | N7 | P2  | N2 | 115.22(16) | N2 | Zn3 | N5 | 98.23(11) |
|    |    |    | )          |    |     |    | )          |    |     |    | )         |
| P1 | N3 | P3 | 115.81(19) | N2 | P2  | N6 | 101.72(15) | N2 | Zn3 | N9 | 72.03(11) |
|    |    |    | )          |    |     |    | )          |    |     |    | )         |
| N3 | P1 | N1 | 108.78(16) | N7 | P2  | N6 | 117.35(16) | N5 | Zn3 | N9 | 83.27(11) |
|    |    |    | )          |    |     |    | )          |    |     |    | )         |
| N4 | P1 | N1 | 99.25(16)  | N3 | P3  | N2 | 107.34(15) | N9 | Zn4 | N5 | 91.00(12) |
|    |    |    | )          |    |     |    | )          |    |     |    | )         |
| N5 | P1 | N1 | 114.81(16) | N8 | P3  | N2 | 107.85(16) | N3 | Zn5 | N6 | 97.03(11) |
|    |    |    | )          |    |     |    | )          |    |     |    | )         |
| N4 | P1 | N3 | 114.89(16) | N9 | P3  | N2 | 105.28(15) | N3 | Zn5 | N8 | 72.31(11) |
|    |    |    | )          |    |     |    | )          |    |     |    | )         |
| N3 | P1 | N5 | 102.24(15) | N8 | P3  | N3 | 105.87(16) | N6 | Zn5 | N8 | 81.72(11) |
|    |    |    | )          |    |     |    | )          |    |     |    | )         |
| N4 | P1 | N5 | 117.16(16) | N9 | P3  | N3 | 107.59(15) | N8 | Zn6 | N6 | 90.90(12) |
|    |    |    | )          |    |     |    | )          |    |     |    | )         |
| N2 | P2 | N1 | 108.49(15) | N8 | P3  | N9 | 122.17(16) |    |     |    | )         |
|    |    |    | )          |    |     |    | )          |    |     |    | )         |
| N6 | P2 | N1 | 115.61(16) | N4 | Zn1 | N1 | 73.35(12)  |    |     |    | )         |
|    |    |    | )          |    |     |    | )          |    |     |    | )         |

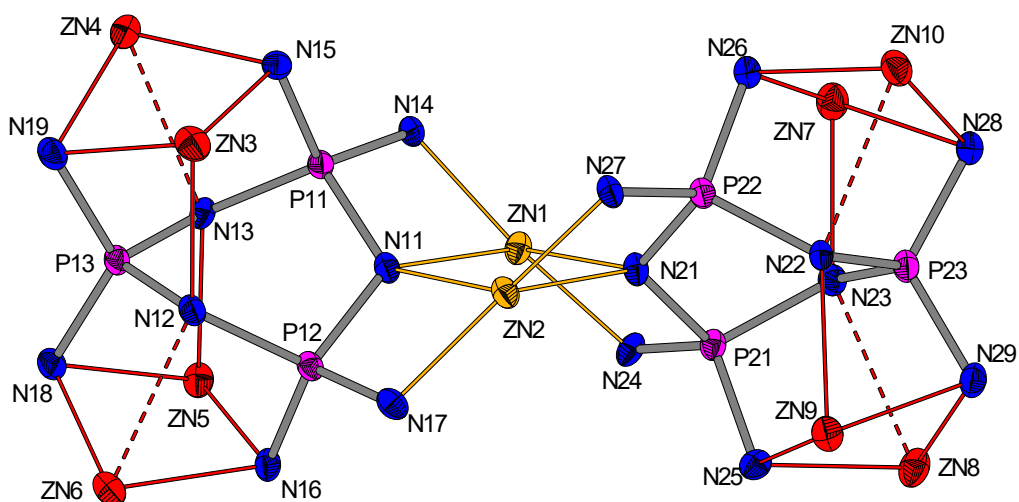

**Fig. S14** Core structure of complex **10** with 30 % probability ellipsoids (isopropyl substituents and Zn bound ethyl groups are omitted for clarity, Zn atoms in red are part of EtZn moieties). Selected bond lengths (Å) and angles (°):

|     |     |          |     |     |          |      |     |          |
|-----|-----|----------|-----|-----|----------|------|-----|----------|
| P11 | N11 | 1.657(4) | P22 | N27 | 1.605(4) | Zn5  | N13 | 2.182(4) |
|     |     | )        |     |     | )        |      |     | )        |
| P11 | N13 | 1.647(4) | P23 | N22 | 1.652(4) | Zn5  | N16 | 2.181(4) |
|     |     | )        |     |     | )        |      |     | )        |
| P11 | N14 | 1.602(4) | P23 | N23 | 1.654(4) | Zn5  | N18 | 2.226(4) |
|     |     | )        |     |     | )        |      |     | )        |
| P11 | N15 | 1.656(4) | P23 | N28 | 1.631(4) | Zn6  | N12 | 2.479(4) |
|     |     | )        |     |     | )        |      |     | )        |
| P12 | N11 | 1.658(4) | P23 | N29 | 1.618(4) | Zn6  | N16 | 2.114(4) |
|     |     | )        |     |     | )        |      |     | )        |
| P12 | N12 | 1.650(4) | Zn1 | N11 | 2.201(4) | Zn6  | N18 | 2.071(4) |
|     |     | )        |     |     | )        |      |     | )        |
| P12 | N16 | 1.665(4) | Zn1 | N14 | 1.945(4) | Zn7  | N23 | 2.166(4) |
|     |     | )        |     |     | )        |      |     | )        |
| P12 | N17 | 1.607(4) | Zn1 | N21 | 2.220(4) | Zn7  | N26 | 2.201(4) |
|     |     | )        |     |     | )        |      |     | )        |
| P13 | N12 | 1.655(4) | Zn1 | N24 | 1.933(4) | Zn7  | N28 | 2.220(4) |
|     |     | )        |     |     | )        |      |     | )        |
| P13 | N13 | 1.666(4) | Zn1 | N21 | 2.221(4) | Zn7  | N23 | 2.481(4) |
|     |     | )        |     |     | )        |      |     | )        |
| P13 | N18 | 1.631(4) | Zn2 | N11 | 1.933(4) | Zn8  | N23 | 2.108(4) |
|     |     | )        |     |     | )        |      |     | )        |
| P13 | N19 | 1.620(4) | Zn2 | N17 | 2.195(4) | Zn8  | N25 | 2.077(4) |
|     |     | )        |     |     | )        |      |     | )        |
| P21 | N21 | 1.655(4) | Zn2 | N21 | 1.933(4) | Zn8  | N29 | 2.165(4) |
|     |     | )        |     |     | )        |      |     | )        |
| P21 | N23 | 1.662(4) | Zn2 | N27 | 2.175(4) | Zn9  | N22 | 2.201(4) |
|     |     | )        |     |     | )        |      |     | )        |
| P21 | N24 | 1.611(4) | Zn3 | N12 | 2.170(4) | Zn9  | N25 | 2.230(4) |
|     |     | )        |     |     | )        |      |     | )        |
| P21 | N25 | 1.648(4) | Zn3 | N15 | 2.247(4) | Zn9  | N29 | 2.453(4) |
|     |     | )        |     |     | )        |      |     | )        |
| P22 | N21 | 1.660(4) | Zn3 | N19 | 2.463(4) | Zn10 | N22 | 2.101(4) |
|     |     | )        |     |     | )        |      |     | )        |
| P22 | N22 | 1.663(4) | Zn4 | N13 | 2.115(4) | Zn10 | N26 | 2.090(4) |
|     |     | )        |     |     | )        |      |     | )        |
| P22 | N26 | 1.651(4) | Zn4 | N15 | 2.073(4) | Zn10 | N28 | )        |
|     |     | )        |     |     | )        |      |     | )        |

|     |     |     |          |     |     |     |            |     |     |     |          |
|-----|-----|-----|----------|-----|-----|-----|------------|-----|-----|-----|----------|
| P11 | N11 | P12 | 116.6(2) | N18 | P13 | N12 | 106.9(2)   | N28 | P23 | N22 | 107.2(2) |
| P12 | N12 | P13 | 115.3(2) | N19 | P13 | N12 | 106.8(2)   | N29 | P23 | N22 | 106.4(2) |
| P11 | N13 | P13 | 115.7(2) | N12 | P13 | N13 | 107.68(19) | N22 | P23 | N23 | 108.5(2) |

|     |     |     |            |     |     |     |          |     |     |     |            |
|-----|-----|-----|------------|-----|-----|-----|----------|-----|-----|-----|------------|
| P21 | N21 | P22 | 116.4(2)   | N18 | P13 | N13 | 106.2(2) | N28 | P23 | N23 | 105.8(2)   |
| P23 | N22 | P22 | 115.1(2)   | N19 | P13 | N13 | 106.6(2) | N29 | P23 | N23 | 107.1(2)   |
| P23 | N23 | P21 | 114.8(3)   | N19 | P13 | N18 | 122.0(2) | N29 | P23 | N28 | 121.3(2)   |
| N13 | P11 | N11 | 107.5(2)   | N24 | P21 | N21 | 98.4(2)  | N14 | Zn1 | N11 | 72.85(15)  |
| N14 | P11 | N11 | 98.6(2)    | N25 | P21 | N21 | 116.4(2) | N24 | Zn1 | N11 | 130.84(16) |
| N15 | P11 | N11 | 116.0(2)   | N21 | P21 | N23 | 107.9(2) | N24 | Zn1 | N14 | 152.16(17) |
| N14 | P11 | N13 | 117.7(2)   | N24 | P21 | N23 | 117.7(2) | N11 | Zn1 | N21 | 86.72(14)  |
| N13 | P11 | N15 | 100.6(2)   | N25 | P21 | N23 | 100.7(2) | N14 | Zn1 | N21 | 129.59(16) |
| N14 | P11 | N15 | 117.0(2)   | N24 | P21 | N25 | 116.3(2) | N24 | Zn1 | N21 | 72.69(15)  |
| N12 | P12 | N11 | 107.9(2)   | N26 | P22 | N21 | 115.8(2) | N17 | Zn2 | N11 | 72.85(16)  |
| N17 | P12 | N11 | 98.7(2)    | N27 | P22 | N21 | 98.5(2)  | N21 | Zn2 | N11 | 86.85(14)  |
| N17 | P12 | N12 | 117.2(2)   | N21 | P22 | N22 | 107.7(2) | N27 | Zn2 | N11 | 130.14(16) |
| N11 | P12 | N16 | 115.8(2)   | N26 | P22 | N22 | 100.3(2) | N27 | Zn2 | N17 | 150.72(16) |
| N12 | P12 | N16 | 101.32(19) | N27 | P22 | N22 | 118.1(2) | N17 | Zn2 | N21 | 132.00(16) |
| N17 | P12 | N16 | 116.3(2)   | N27 | P22 | N26 | 117.0(2) | N27 | Zn2 | N21 | 73.34(15)  |

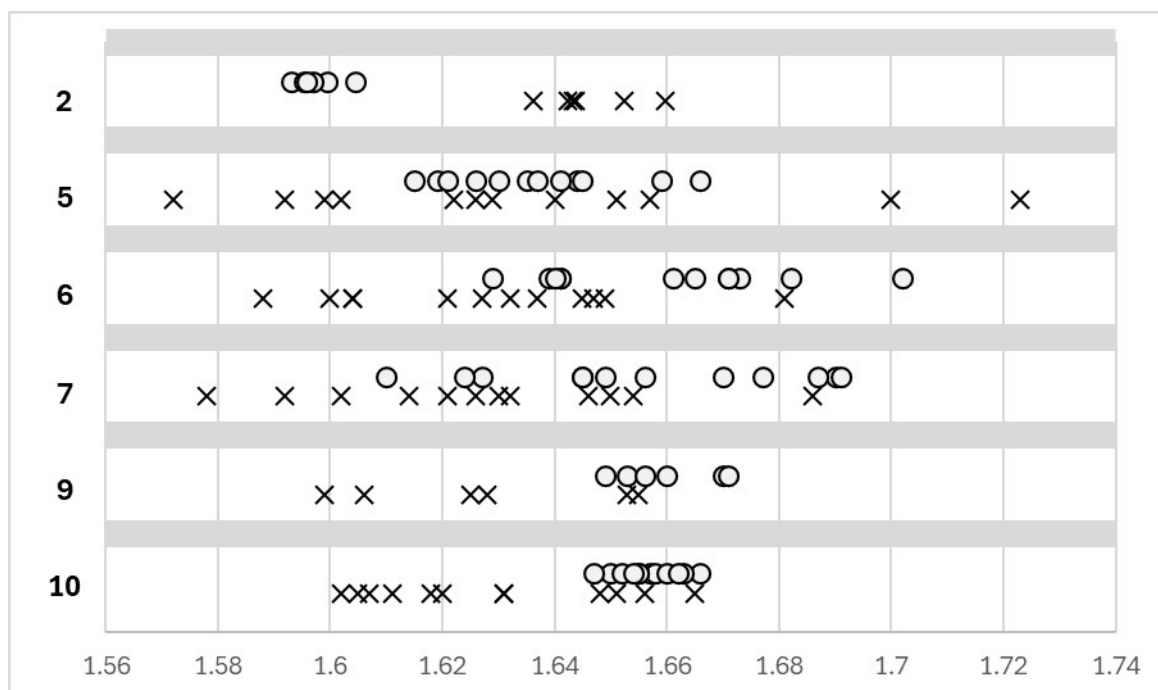

**Fig. S15** Distribution of P-N bond lengths (Å) in crystal structures of **2**, **5**, **6**, **7**, **9** and **10**. Circles represent P-N(ring) bonds, crosses P-N(exo) bonds.

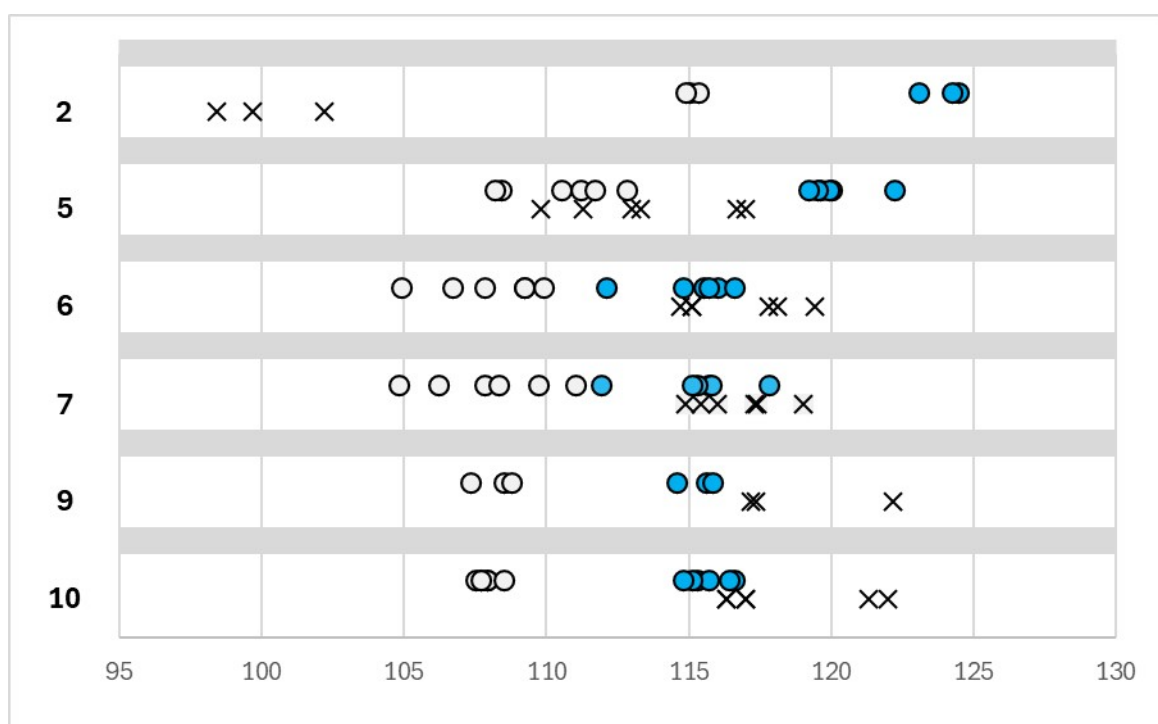

**Fig. S16** Distribution of bond angles (°) in crystal structures of **2**, **5**, **6**, **7**, **9** and **10**. Circles represent angles in the ring (N-P-N, grey; P-N-P, blue), crosses N(exo)-P-N(exo) angles.

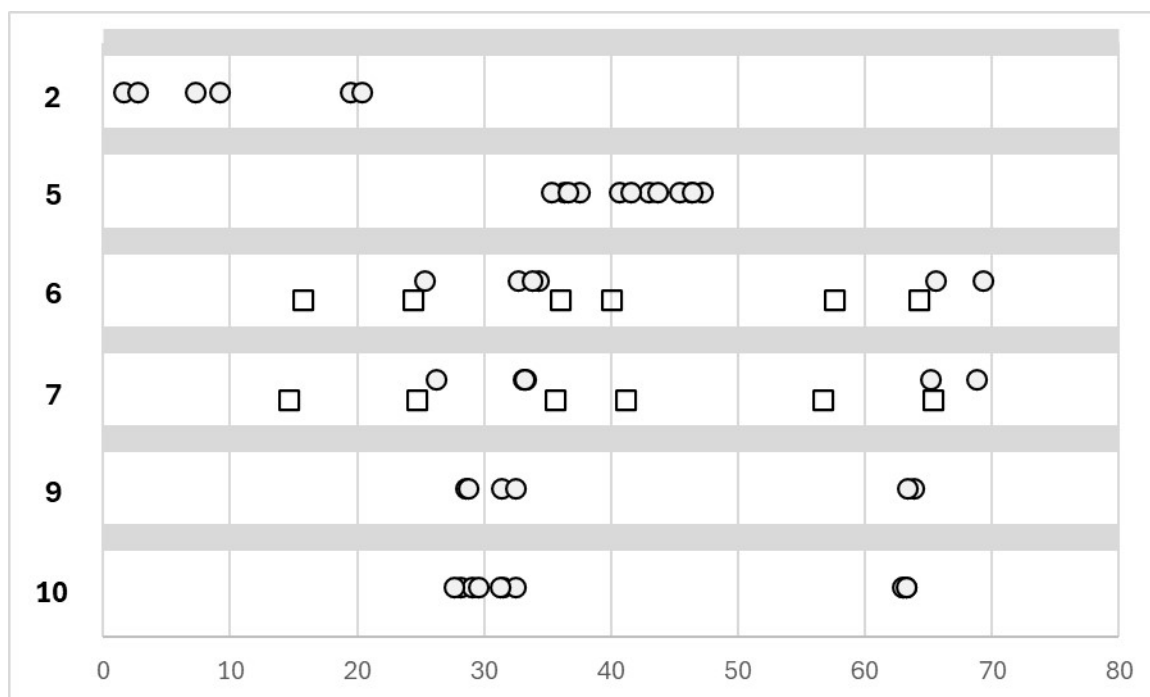

**Fig. S17** Distribution of phosphazene ring torsion angles ( $^{\circ}$ ) in crystal structures of **2**, **5**, **6**, **7**, **9** and **10**. For **6** and **7** circles represent rings with twist, squares rings with *twist-boat* conformation.

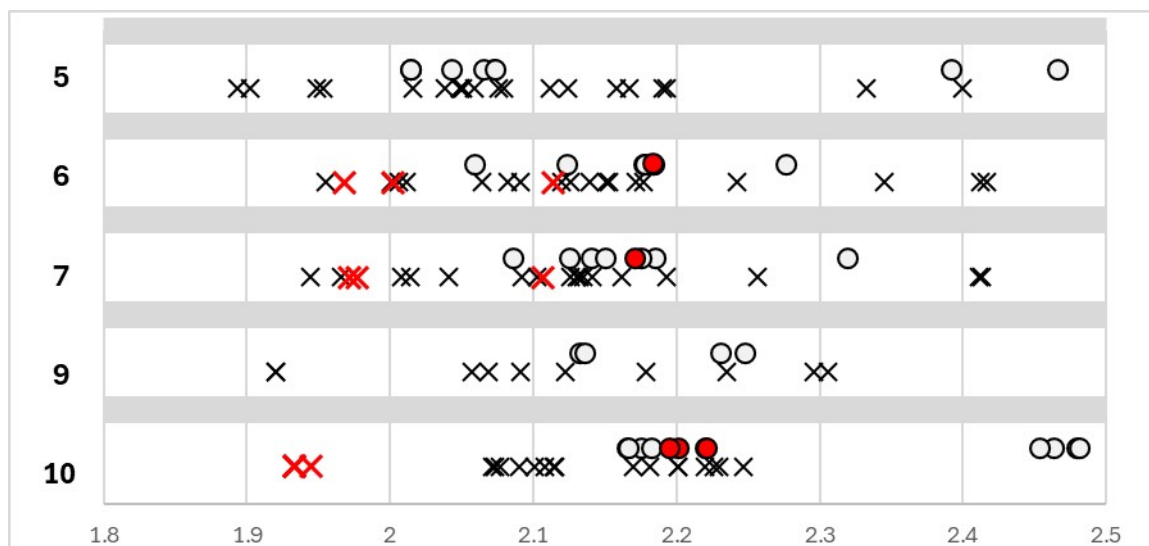

**Fig. S18** Distribution of Zn-N bond lengths ( $\text{\AA}$ ) in crystal structures of **5**, **6**, **7**, **9** and **10**. Circles represent Zn-N(ring) bonds, crosses Zn-N(exo) bonds. Ticks marked in red denote bonds involving Zn atoms that do not bear ethyl groups.



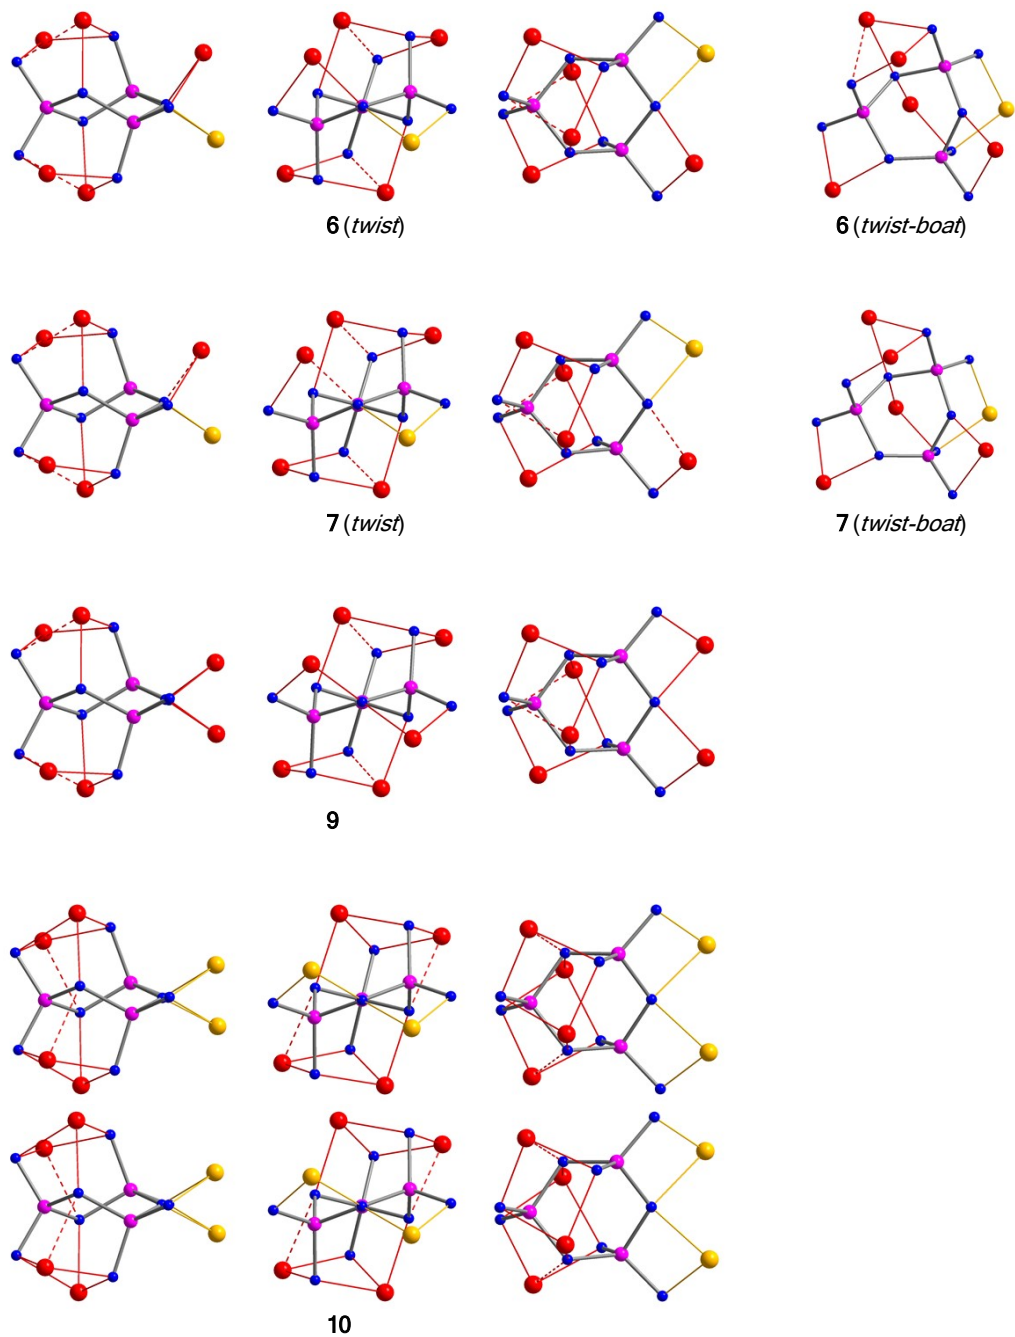

**Fig. S19** The three columns on the left show different views of the coordination pattern of *twist* conformers. The fourth column shows the coordination pattern of *twist-boat* conformers found in **6** and **7**. Alkyl substituents and zinc bound ethyl groups are omitted for clarity; Zn atoms in red are part of EtZn moieties, those in yellow do not bear ethyl groups.

## Ring puckering parameters

Ring puckering parameters of the phosphazene rings were calculated according to Cremer and Pople.<sup>S3</sup> The puckering of a six-membered ring is defined by three parameters. In polar coordinates these are  $Q$ ,  $\theta$  and  $\phi$ .  $Q$  is the total puckering amplitude, while the angles  $\theta$  and  $\phi$  determine the ring conformation. At  $Q = 0$ , the ring is planar. On a sphere with radius  $Q$ , the angles  $\theta$  and  $\phi$  define latitude and longitude, respectively. Positions at the poles ( $\theta = 0^\circ$  and  $180^\circ$ ) correspond to a *chair* conformation, while *boat* and *twist* conformations are found at the equator ( $\theta = 90^\circ$ ); the *boat* occurs at phase angles  $\phi = 0, 60, 120, 180, 240, 300^\circ$  and the *twist* at  $\phi = 30, 90, 150, 210, 270, 330^\circ$ . Note that at  $\theta = 0^\circ$  and  $180^\circ$   $\phi$  is not defined.

Table S7 lists puckering parameters of EtZn complexes that are based on coordinates obtained from X-ray structure analysis. Angles  $\theta$  and  $\phi$  are normalised to  $0^\circ < \theta < 90^\circ$  and  $0^\circ < \phi < 30^\circ$ , respectively.

**Table S2** Puckering parameters of and conformations phosphazene rings in EtZn complexes.

|           | $Q$   | $\theta$ ( $^\circ$ ) | $\phi$ ( $^\circ$ ) | ring conformation |
|-----------|-------|-----------------------|---------------------|-------------------|
| <b>5</b>  | 0.442 | 10.2                  | 7.5                 | <i>chair</i>      |
|           | 0.449 | 11.1                  | 6.9                 | <i>chair</i>      |
| <b>6</b>  | 0.840 | 88.3                  | 27.3                | <i>twist</i>      |
|           | 0.776 | 88.3                  | 20.1                | <i>twist-boat</i> |
| <b>7</b>  | 0.826 | 88.7                  | 28.0                | <i>twist</i>      |
|           | 0.767 | 88.0                  | 20.5                | <i>twist-boat</i> |
| <b>8a</b> | 0.467 | 6.0                   | 19.4                | <i>chair</i>      |
| <b>9</b>  | 0.801 | 89.7                  | 29.6                | <i>twist</i>      |
| <b>10</b> | 0.805 | 89.9                  | 29.5                | <i>twist</i>      |
|           | 0.811 | 89.8                  | 29.3                | <i>twist</i>      |

S3 D. Cremer, J. A. Pople, *J. Am. Chem. Soc.*, 1975, **97**, 1354.

## Appendix

$^1\text{H}$  and  $^{13}\text{C}$  NMR spectra of **5**, **6** and **7** have been presented in the PhD thesis "Phosphazenate ligands as stable platforms for multinuclear organometallic arrays" by Philip I. Richards;  $[(\text{ZnEt})_6\text{A}]_2$  refers to **5**,  $(\text{Zn})(\text{ZnEt})_6\text{B}_2$  to **6** and  $(\text{Zn})(\text{ZnEt})_6\text{E}_2$  to **7**.

Experimental chapter.

### 8.4 Zinc complexes.

#### $[(\text{ZnEt})_6\text{A}]_2$ .

1g ( $3.17 \times 10^{-3}$  mol) of the hexakis(methylamino) cyclotriphosphazene,  $\text{AH}_6$ , are suspended in 20 mL of thf. To this suspension is added 19.35 mL ( $19.35 \times 10^{-3}$  mol, 6.1eq) of  $\text{ZnEt}_2$ . The solution is heated to reflux for 15 mins. During which time the suspension dissolves to leave a clear solution.

Single crystals suitable for x-ray diffraction are collected from a thf/hexane solution at  $-20^\circ\text{C}$ .

Yield 2.39g (86%)

$^1\text{H}$  NMR (400.13MHz,  $d^8$ toluene,  $25^\circ\text{C}$ , TMS):  $\delta = 0.39$  ppm (m, 24H,  $\text{ZnCH}_2\text{CH}_3$ ), 1.29 ppm (m, 36H,  $\text{ZnCH}_2\text{CH}_3$ ), 2.52 ppm (br, 36H,  $\text{NCH}_3$ ).

$^{13}\text{C}\{^1\text{H}\}$  NMR (100.62MHz,  $d^8$ toluene,  $25^\circ\text{C}$ , TMS):  $\delta = 11.8$  ppm (m, 12C,  $\text{ZnCH}_2\text{CH}_3$ ), 32.15 ppm (m, 12C,  $\text{ZnCH}_2\text{CH}_3$ ), 32.1 ppm (br, 12C,  $\text{NCH}_3$ ).

$^{31}\text{P}$  NMR (161.97MHz, Toluene,  $25^\circ\text{C}$ , 85%  $\text{H}_3\text{PO}_4$ ):  $\delta = 44.95$  ppm ( $^2\text{J} = 8.47$  Hz, second coupling not seen), 37.71 ppm ( $^2\text{J} = 8.47$  Hz,  $^2\text{J} = 28.83$  Hz) and 26.75 ppm ( $^2\text{J} = 28.83$  Hz, other coupling not seen).

IR (Nujol):  $\nu(\text{cm}^{-1}) = 1165, 1056$  (P-N stretch), 905, 832, 658.

Elemental analysis  $\text{P}_6\text{N}_{18}\text{C}_{36}\text{H}_{96}\text{Zn}_{12}$  (1751.80): calcd. C 24.68, H 5.52, N 14.40; found C 24.72, H 5.41, N 12.41.

m.p. =  $+350^\circ\text{C}$ , blackens at  $190^\circ\text{C}$ .

|                  |                                                                                 |                                        |            |
|------------------|---------------------------------------------------------------------------------|----------------------------------------|------------|
| Chemical Formula | C <sub>36</sub> H <sub>96</sub> N <sub>18</sub> P <sub>6</sub> Zn <sub>12</sub> | V/ Å <sup>3</sup>                      | 3270.1(14) |
| FW               | 1751.80                                                                         | Z                                      | 4          |
| Crystal system   | Triclinic                                                                       | $\rho_{\text{calc}}/\text{g cm}^{-3}$  | 1.779      |
| Space group      | P-1                                                                             | T/K                                    | 150(2)     |
| a/ Å             | 11.937(3)                                                                       | $\lambda(\text{MoK}\alpha)/\text{Å}$   | 0.71073    |
| b/ Å             | 12.505(3)                                                                       | $\mu(\text{MoK}\alpha)/\text{mm}^{-1}$ | 4.502      |
| c/ Å             | 25.365(7)                                                                       | Data/parameters                        | 8463 / 673 |
| $\alpha/^\circ$  | 91.181(4)                                                                       | R <sub>1</sub> (I>2 $\sigma$ (I))      | 0.0665     |
| $\beta/^\circ$   | 99.781(4)                                                                       | wR <sup>2</sup> (all data)             | 0.2192     |
| $\gamma/^\circ$  | 118.070(4)                                                                      |                                        |            |

**(Zn)(ZnEt)<sub>10</sub>B.**

1g (2.50 x10<sup>-3</sup> mol) of the hexakis(ethylamino) cyclotriphosphazene, **BH<sub>6</sub>**, are suspended in 20 mL of hexane. To this suspension is added 15.27 mL (15.27 x10<sup>-3</sup> mol, 6.1 eq) of ZnEt<sub>2</sub>. The solution is heated to reflux for 15 mins. During which time the suspension dissolves to leave a clear solution.

Single crystals suitable for x-ray diffraction are collected from a hexane solution at 25°C.

Yield 1.71g (76%)

<sup>1</sup>H NMR (400.13MHz, d<sup>8</sup>toluene, 25°C, TMS):  $\delta$  = 0.67 ppm (m, 20H, ZnCH<sub>2</sub>CH<sub>3</sub>), 1.28 ppm (m, 30H, ZnCH<sub>2</sub>CH<sub>3</sub>), 1.28 – 1.49 ppm (m, 18H, NCH<sub>2</sub>CH<sub>3</sub>), 3.13 ppm (m, 12H, NCH<sub>2</sub>CH<sub>3</sub>).

<sup>13</sup>C{<sup>1</sup>H} NMR (100.62MHz, d<sup>8</sup>toluene, 25°C, TMS):  $\delta$  = 12.7 ppm (m, 10C, ZnCH<sub>2</sub>CH<sub>3</sub>), 18 ppm (br, 12C, NCH<sub>2</sub>CH<sub>3</sub>), 30.3 ppm (m, 10C, ZnCH<sub>2</sub>CH<sub>3</sub>), 40.5 ppm (br, 12C, NCH<sub>2</sub>CH<sub>3</sub>).

Experimental chapter.

$^{31}\text{P}$  NMR (161.97MHz, Toluene, 25°C, 85%  $\text{H}_3\text{PO}_4$ ):  $\delta = 44.74, 39.49$  ppm  
(Coupling not observed).

IR (Nujol):  $\nu(\text{cm}^{-1}) = 1258, 1093$  (P-N stretch), 1043 (P-N stretch), 874, 796.

Elemental analysis  $\text{P}_6\text{N}_{18}\text{C}_{44}\text{H}_{110}\text{Zn}_{11}$  (1796.38): calcd. C 29.42, H 6.17, N 14.04; found C 29.03, H 6.03, N 12.35.

m.p. = 118°C accompanied by a blackening transition.

|                  |                                                                    |                                        |            |
|------------------|--------------------------------------------------------------------|----------------------------------------|------------|
| Chemical Formula | $\text{C}_{44}\text{H}_{110}\text{N}_{18}\text{P}_6\text{Zn}_{11}$ | $V/\text{Å}^3$                         | 7396(3)    |
| FW               | 1796.38                                                            | Z                                      | 8          |
| Crystal system   | Monoclinic                                                         | $\rho_{\text{calc}}/\text{g cm}^{-3}$  | 1.724      |
| Space group      | P2(1)/c                                                            | T/K                                    | 150(2)     |
| a/Å              | 20.369(4)                                                          | $\lambda(\text{MoK}\alpha)/\text{Å}$   | 0.71073    |
| b/Å              | 12.655(3)                                                          | $\mu(\text{MoK}\alpha)/\text{mm}^{-1}$ | 3.989      |
| c/Å              | 28.711(6)                                                          | Data/parameters                        | 9585 / 767 |
| $\alpha/^\circ$  | 90.00                                                              | $R_1(I > 2\sigma(I))$                  | 0.0392     |
| $\beta/^\circ$   | 91.98(3)                                                           | $wR^2(\text{all data})$                | 0.1145     |
| $\gamma/^\circ$  | 90.00                                                              |                                        |            |

**(Zn)(ZnEt) $_{10}$ E.**

1g ( $2.07 \times 10^{-3}$  mol) of the hexakis(*n*-propylamino) cyclotriphosphazene,  $\text{EH}_6$ , are dissolved in 20 mL of hexane. To this solution is added 12.61 mL ( $12.61 \times 10^{-3}$  mol, 6.1 eq) of  $\text{ZnEt}_2$ . The solution is heated to reflux for 2 h.

Single crystals suitable for x-ray diffraction are collected from a hexane solution at -20°C.

Yield 1.67g (82%)

Experimental chapter.

$^1\text{H}$  NMR (400.13MHz,  $d^8$ toluene, 25°C, TMS):  $\delta$  = 0.65 ppm (m, 20H,  $\text{ZnCH}_2\text{CH}_3$ ), 0.75 ppm (m, 36H,  $\text{NCH}_2\text{CH}_2\text{CH}_3$ ), 1.10 ppm (m, 30H,  $\text{ZnCH}_2\text{CH}_3$ ), 1.34 ppm (m, 24H,  $\text{NCH}_2\text{CH}_2\text{CH}_3$ ), 2.90 ppm (m, 24H,  $\text{NCH}_2\text{CH}_2\text{CH}_3$ ).

$^{13}\text{C}\{^1\text{H}\}$  NMR (100.62MHz,  $d^8$ toluene, 25°C, TMS):  $\delta$  = 11.9 ppm (m, 10C,  $\text{ZnCH}_2\text{CH}_3$ ), 12 ppm (br, 12C,  $\text{NCH}_2\text{CH}_2\text{CH}_3$ ), 30.3 ppm (m, 10C,  $\text{ZnCH}_2\text{CH}_3$ ), 30.5 ppm (br, 12C,  $\text{NCH}_2\text{CH}_2\text{CH}_3$ ), 42 ppm (br, 12C,  $\text{NCH}_2\text{CH}_2\text{CH}_3$ ).

$^{31}\text{P}$  NMR (161.97MHz, Toluene, 25°C, 85%  $\text{H}_3\text{PO}_4$ ):  $\delta$  = 45.21, 38.85 ppm (Coupling not observed).

IR (Nujol):  $\nu(\text{cm}^{-1})$  = 1258, 1089 (P-N stretch), 1019 (P-N stretch), 943, 868, 801.

Elemental analysis  $\text{P}_6\text{N}_{18}\text{C}_{56}\text{H}_{134}\text{Zn}_{11}$  (1964.69): calcd. C 34.23, H 6.87, N 12.84; found C 30.10, H 6.79, N 7.63.

m.p. = 142°C accompanied by a blackening transition.

|                  |                                                                    |                                        |             |
|------------------|--------------------------------------------------------------------|----------------------------------------|-------------|
| Chemical Formula | $\text{C}_{56}\text{H}_{134}\text{N}_{18}\text{P}_6\text{Zn}_{11}$ | $V/\text{\AA}^3$                       | 8684(4)     |
| FW               | 1964.69                                                            | Z                                      | 4           |
| Crystal system   | Monoclinic                                                         | $\rho_{\text{calc}}/\text{g cm}^{-3}$  | 2.241       |
| Space group      | P2(1)/n                                                            | T/K                                    | 150(2)      |
| a/ $\text{\AA}$  | 13.276(2)                                                          | $\lambda(\text{MoK}\alpha)/\text{\AA}$ | 0.71073     |
| b/ $\text{\AA}$  | 28.803(11)                                                         | $\mu(\text{MoK}\alpha)/\text{mm}^{-1}$ | 6.894       |
| c/ $\text{\AA}$  | 22.877(4)                                                          | Data/parameters                        | 11036 / 880 |
| $\alpha /^\circ$ | 90.00                                                              | $R_1(I > 2\sigma(I))$                  | 0.0664      |
| $\beta /^\circ$  | 96.93(2)                                                           | $wR^2(\text{all data})$                | 0.1743      |
| $\gamma /^\circ$ | 90.00                                                              |                                        |             |
